# Supplementary material for: Palladium-catalyzed C(sp2)–H aminoimidoylation of isocyano-containing arenes: synthesis of amino substituted N-heterocycles
Source: Royal Society of Chemistry journal article supplement (doi:10.1039/c7qo00368d), 2017-01-01

## SUPPORTING INFORMATION

# Palladium-Catalyzed C(sp<sup>2</sup>)-H Aminoimidoylation of Isocyano-Containing Arenes: Synthesis of Amino Substituted N-Heterocycles

Zhuang Xiong,<sup>†</sup> Jian Wang,<sup>‡</sup> Yanbo Wang,<sup>†</sup> Shuang Luo\*,<sup>†</sup> and Qiang Zhu\*,<sup>†</sup>

<sup>†</sup>State Key Laboratory of Respiratory Disease, Guangzhou Institutes of Biomedicine and Health, Chinese Academy of Sciences, 190 Kaiyuan Avenue, Guangzhou 510530, China.

<sup>‡</sup>Key Laboratory of Functional Molecular Solids, Ministry of Education, Anhui Laboratory of Molecule-Based Materials, College of Chemistry and Materials Science, Anhui Normal University, Wuhu, Anhui 241000, P. R. China.

## Contents

|                                                                    |    |
|--------------------------------------------------------------------|----|
| I. General Information .....                                       | 2  |
| II. General Procedure .....                                        | 2  |
| III. Characterization Data .....                                   | 4  |
| IV. Copies of <sup>1</sup> H and <sup>13</sup> C NMR Spectra ..... | 18 |
| V. Deuteration Studies .....                                       | 42 |

## I. General Information

$^1\text{H}$  NMR (400 MHz) and  $^{13}\text{C}$  NMR (125 MHz) were registered on 400 M and 500 M spectrometers. Chemical shifts were reported in units (ppm) by assigning TMS resonance in the  $^1\text{H}$  spectrum as 0.00 ppm,  $\text{CDCl}_3$  resonance in the  $^{13}\text{C}$  spectrum as 77.0 ppm. All coupling constants ( $J$  values) were reported in Hertz (Hz). NMR analysis was carried out at 298 K unless noted otherwise. IR spectra were recorded on a Bruker Tensor 27 spectrometer using a diamond comb. Melting points were performed on an X-6 spectrometer. HRMS was obtained on an ESI-LC-MS/MS spectrometer. Isocyanides and *N*-benzoyloxyamines were prepared according to the following literatures:

- (1) M. Tobisu, K. Koh, T. Furukawa, N. Chatani, *Angew. Chem., Int. Ed.* 2012, **51**, 11363.
- (2) H. Wang, Y. Yu, X. Hong, B. Xu, *Chem. Commun.* 2014, **50**, 13485.
- (3) A. M. Berman, J. S. Johnson, *J. Org. Chem.* 2006, **71**, 219.

## II. General Procedure

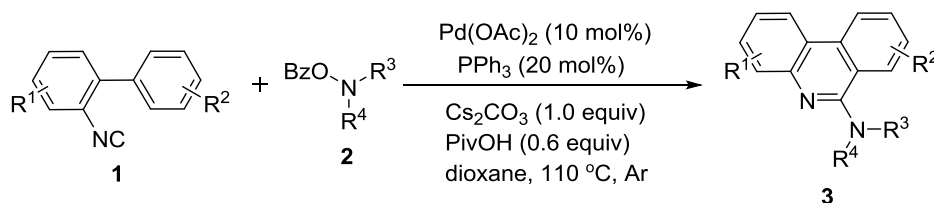

**General procedure A:** An oven-dried 25 mL Schlenk tube charged with  $\text{Pd}(\text{OAc})_2$  (0.01 mmol, 2.24 mg),  $\text{PPh}_3$  (0.02 mmol, 5.24 mg),  $\text{Cs}_2\text{CO}_3$  (0.10 mmol, 32.6 mg) and **2** (0.15 mmol) was refilled with Ar for 3 times. Then a solution of pivalic acid (0.06 mmol, 7.0  $\mu\text{L}$ ) in 0.5 mL of dioxane was added by syringe and the tube was placed in a 110 °C oil-bath. A solution of **1** (0.1 mmol) in 1.0 mL of dioxane was added dropwise within 1 h by a syringe pump to the reaction mixture. After reacting for another 1-2 h, the reaction was completed. The crude reaction mixture was extracted with EA (20 mL  $\times$  3) and washed with brine (20 mL). The organic phase was concentrated in *vacuo* and the residue was purified by silica gel flash column chromatography to afford the corresponding amino-substituted

phenanthridines **3**.

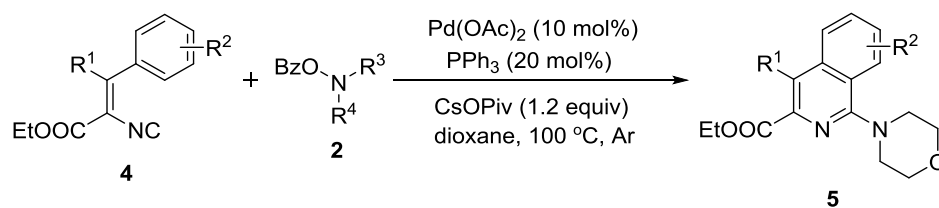

**General procedure B:** An oven-dried 25 mL Schlenk tube charged with Pd(OAc)<sub>2</sub> (0.01 mmol, 2.24 mg), PPh<sub>3</sub> (0.02 mmol, 5.24 mg), CsOPiv (0.12 mmol, 28.08 mg) and **2** (0.15 mmol) was refilled with Ar for 3 times. Then 0.5 mL of dioxane was added by syringe and the tube was placed in a 100 °C oil-bath. A solution of **4** (0.10 mmol) in 1.0 mL of dioxane was added dropwise within 1 h by a syringe pump to the reaction mixture. After reacting for another 1-2 h, the reaction was completed. The crude reaction mixture was extracted with EA (20 mL × 3) and washed with brine (20 mL). The organic phase was concentrated in *vacuo* and the residue was purified by silica gel flash column chromatography to afford the corresponding amino-substituted isoquinolines **5**.

### III. Characterization Data

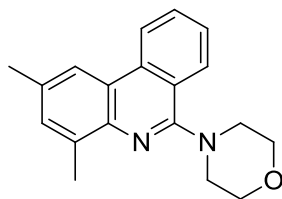

#### 4-(2,4-dimethylphenanthridin-6-yl)morpholine (**3a**)

Prepared from 2-isocyano-3,5-dimethyl-1,1'-biphenyl (20.7 mg, 0.10 mmol, 1.0 equiv) and morpholino benzoate (31.1 mg, 0.15 mmol, 1.5 equiv) according to the general procedure. Column chromatography purification (EtOAc : petroleum ether = 1 : 30) furnished the product **3a** as a white solid (23 mg, 0.078 mmol, 78% yield).  $^1\text{H}$  NMR (400 MHz,  $\text{CDCl}_3$ ):  $\delta$  8.55 (d,  $J = 8.3$  Hz, 1H), 8.19 (d,  $J = 8.1$  Hz, 1H), 8.09 (s, 1H), 7.74 (t,  $J = 7.2$  Hz, 1H), 7.59 (t,  $J = 7.2$  Hz, 1H), 7.36 (s, 1H), 4.01 (t,  $J = 4.5$  Hz, 4H), 3.51 (t,  $J = 4.6$  Hz, 4H), 2.74 (s, 3H), 2.54 (s, 3H);  $^{13}\text{C}$  NMR (125 MHz,  $\text{CDCl}_3$ ):  $\delta$  157.9, 140.4, 136.3, 135.3, 134.0, 131.2, 129.8, 126.4, 126.2, 123.1, 122.3, 121.0, 119.4, 67.2, 51.9, 21.9, 18.2; IR (KBr): 3069, 2967, 2913, 2893, 2857, 1607, 1574, 1522, 1447, 1278, 772  $\text{cm}^{-1}$ ; HRMS: calcd for  $\text{C}_{19}\text{H}_{20}\text{N}_2\text{O}$  ( $\text{M}+\text{H}^+$ ) 293.1648; found 293.1645; mp: 118-120  $^\circ\text{C}$ .

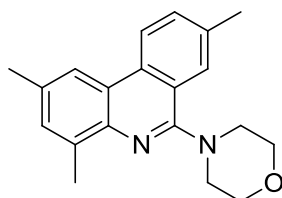

#### 4-(2,4,8-trimethylphenanthridin-6-yl)morpholine (**3b**)

Prepared from 2-isocyano-3,4',5-trimethyl-1,1'-biphenyl (22.1 mg, 0.10 mmol, 1.0 equiv) and morpholino benzoate (31.1 mg, 0.15 mmol, 1.5 equiv) according to the general procedure. Column chromatography purification (EtOAc : petroleum ether = 1 : 16) furnished the product **3b** as a light yellow solid (16 mg, 0.052 mmol, 52% yield).  $^1\text{H}$  NMR (400 MHz,  $\text{CDCl}_3$ ):  $\delta$  8.44 (d,  $J = 8.4$  Hz, 1H), 8.06 (s, 1H), 7.96 (s, 1H), 7.56 (d,  $J = 8.4$  Hz, 1H), 7.33 (s, 1H), 4.02 (t,  $J = 4.5$  Hz, 4H), 3.50 (t,  $J = 4.6$  Hz, 4H), 2.73 (s, 3H), 2.58 (s, 3H), 2.54 (s, 3H);  $^{13}\text{C}$  NMR (125 MHz,  $\text{CDCl}_3$ ):  $\delta$  157.7, 140.0, 136.3, 136.2, 133.9, 133.1, 131.5, 130.8, 125.6, 123.1, 122.4, 121.1, 119.2, 67.2, 51.9, 22.0, 21.9, 18.2; IR (KBr): 3010, 2954, 2919, 2890, 2867, 1605, 1573, 1528, 1451, 1282, 789  $\text{cm}^{-1}$ ; HRMS: calcd for  $\text{C}_{20}\text{H}_{22}\text{N}_2\text{O}$  ( $\text{M}+\text{H}^+$ ) 307.1805; found

307.1805; mp: 88-90 °C.

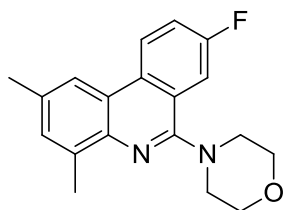

4-(8-fluoro-2,4-dimethylphenanthridin-6-yl)morpholine (**3c**)

Prepared from 4'-fluoro-2-isocyano-3,5-dimethyl-1,1'-biphenyl (22.5 mg, 0.10 mmol, 1.0 equiv) and morpholino benzoate (31.1 mg, 0.15 mmol, 1.5 equiv) according to the general procedure. Column chromatography purification (EtOAc : petroleum ether = 1 : 8) furnished the product **3c** as a light yellow solid (21 mg, 0.068 mmol, 68% yield). <sup>1</sup>H NMR (400 MHz, CDCl<sub>3</sub>): δ 8.55-8.51 (m, 1H), 8.02 (s, 1H), 7.81-7.78 (m, 1H), 7.51-7.45 (m, 1H), 7.35 (s, 1H), 4.01 (t, *J* = 4.5 Hz, 4H), 3.46 (t, *J* = 4.6 Hz, 4H), 2.72 (s, 3H), 2.53 (s, 3H); <sup>13</sup>C NMR (125 MHz, CDCl<sub>3</sub>): δ 162.2 (d, *J* = 246.8 Hz), 157.3 (d, *J* = 4.1 Hz), 140.0, 136.6, 134.6, 131.8 (d, *J* = 1.8 Hz), 131.1, 125.7 (d, *J* = 8.23 Hz), 122.5 (d, *J* = 7.4 Hz), 121.9, 119.2, 119.0 (d, *J* = 23.8 Hz), 110.9 (d, *J* = 21.8 Hz), 67.1, 51.8, 21.9, 18.2; IR (KBr): 3071, 2981, 2916, 2895, 2859, 1617, 1576, 1529, 1450, 1282, 752 cm<sup>-1</sup>; HRMS: calcd for C<sub>19</sub>H<sub>19</sub>FN<sub>2</sub>O (M+H<sup>+</sup>) 311.1554; found 311.1554; mp: 127-129 °C.

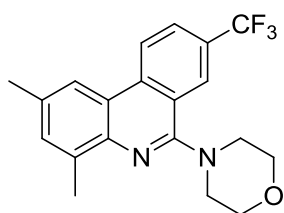

4-(2,4-dimethyl-8-(trifluoromethyl)phenanthridin-6-yl)morpholine (**3d**)

Prepared from 2-isocyano-3,5-dimethyl-4'-(trifluoromethyl)-1,1'-biphenyl (27.5 mg, 0.10 mmol, 1.0 equiv) and morpholino benzoate (31.1 mg, 0.15 mmol, 1.5 equiv) according to the general procedure. Column chromatography purification (EtOAc : petroleum ether = 1 : 16) furnished the product **3d** as a white solid (26 mg, 0.072 mmol, 72% yield). <sup>1</sup>H NMR (400 MHz, CDCl<sub>3</sub>): δ 8.63 (d, *J* = 8.7 Hz, 1H), 8.45 (s, 1H), 8.07 (s, 1H), 7.91 (d, *J* = 8.7 Hz, 1H), 7.42 (s, 1H), 4.02 (t, *J* = 4.5 Hz, 4H), 3.49 (t, *J* = 4.6 Hz, 4H), 2.73 (s, 3H), 2.55 (s, 3H); <sup>13</sup>C NMR (125 MHz, CDCl<sub>3</sub>): δ 157.7, 141.2, 137.5, 136.7, 134.7, 132.4, 128.4 (q, *J* = 32.7 Hz), 125.7 (q, *J* = 3.53 Hz),

125.4 (q,  $J = 272.3$  Hz), 124.2, 123.8 (q,  $J = 4.2$  Hz), 121.4, 120.4, 119.7, 66.9, 51.9, 21.9, 18.1; IR (KBr): 3015, 2973, 2920, 2867, 2848, 1625, 1577, 1456, 1435, 1274, 797  $\text{cm}^{-1}$ ; HRMS: calcd for  $\text{C}_{20}\text{H}_{19}\text{F}_3\text{N}_2\text{O}$  ( $\text{M}+\text{H}^+$ ) 361.1522; found 361.1521; mp: 127-129  $^{\circ}\text{C}$ .

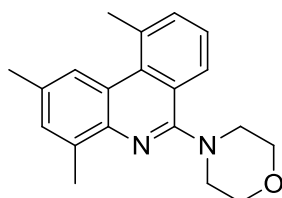

#### 4-(2,4,10-trimethylphenanthridin-6-yl)morpholine (**3e**)

Prepared from 2-isocyano-2',3,5-trimethyl-1,1'-biphenyl (22.1 mg, 0.10 mmol, 1.0 equiv) and morpholino benzoate (31.1 mg, 0.15 mmol, 1.5 equiv) according to the general procedure. Column chromatography purification (EtOAc : petroleum ether = 1 : 16) furnished the product **3e** as a white solid (24 mg, 0.076 mmol, 76% yield).  $^1\text{H}$  NMR (400 MHz,  $\text{CDCl}_3$ ):  $\delta$  8.35 (s, 1H), 8.18 (d,  $J = 7.9$  Hz, 1H), 7.58 (d,  $J = 7.0$  Hz, 1H), 7.49 (t,  $J = 7.6$  Hz, 1H), 7.38 (s, 1H), 4.01 (t,  $J = 4.5$  Hz, 4H), 3.46 (t,  $J = 4.6$  Hz, 4H), 3.09 (s, 3H), 2.76 (s, 3H), 2.55 (s, 3H);  $^{13}\text{C}$  NMR (125 MHz,  $\text{CDCl}_3$ ):  $\delta$  158.6, 141.3, 136.2, 135.9, 134.8, 134.2, 132.9, 130.5, 126.0, 124.8, 124.3, 123.8, 122.4, 67.2, 51.9, 27.1, 22.3, 18.8; IR (KBr): 3018, 2952, 2918, 2884, 2850, 1614, 1583, 1528, 1448, 1279, 750  $\text{cm}^{-1}$ ; HRMS: calcd for  $\text{C}_{20}\text{H}_{22}\text{N}_2\text{O}$  ( $\text{M}+\text{H}^+$ ) 307.1805; found 307.1804; mp: 125-127  $^{\circ}\text{C}$ .

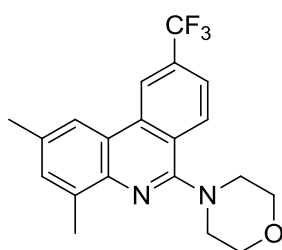

#### 4-(2,4-dimethyl-9-(trifluoromethyl)phenanthridin-6-yl)morpholine (**3f**)

Prepared from 2-isocyano-3,5-dimethyl-3'-(trifluoromethyl)-1,1'-biphenyl (27.5 mg, 0.10 mmol, 1.0 equiv) and morpholino benzoate (31.1 mg, 0.15 mmol, 1.5 equiv) according to the general procedure. Column chromatography purification (EtOAc : petroleum ether = 1 : 16) furnished the product **3f** as a light yellow solid (16 mg, 0.045 mmol, 45 % yield).  $^1\text{H}$  NMR (400 MHz,  $\text{CDCl}_3$ ):  $\delta$  8.80 (s, 1H), 8.29 (d,  $J = 8.6$  Hz, 1H), 8.08 (s, 1H), 7.79 (d,  $J = 8.6$  Hz, 1H), 7.41 (s, 1H), 4.02 (t,  $J = 4.5$  Hz, 4H),

3.49 (t,  $J = 4.7$  Hz, 4H), 2.73 (s, 3H), 2.56 (s, 3H);  $^{13}\text{C}$  NMR (125 MHz,  $\text{CDCl}_3$ ):  $\delta$  157.2, 140.7, 136.5, 134.9, 134.7, 132.0, 131.5 (q,  $J = 32.3$  Hz), 127.2, 125.2 (q,  $J = 273.0$  Hz), 122.5, 122.2 (q,  $J = 3.6$  Hz), 121.6, 120.5 (q,  $J = 3.8$  Hz), 119.3, 66.9, 51.7, 21.8, 17.9; IR (KBr): 3050, 2960, 2916, 2893, 2857, 1727, 1585, 1517, 1453, 1278, 798  $\text{cm}^{-1}$ ; HRMS: calcd for  $\text{C}_{20}\text{H}_{19}\text{F}_3\text{N}_2\text{O}$  ( $\text{M}+\text{H}^+$ ) 361.1522; found 361.1526; mp: 168-170  $^\circ\text{C}$ .

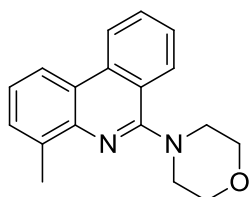

#### 4-(4-methylphenanthridin-6-yl)morpholine (**3g**)

Prepared from 2-isocyano-3-methyl-1, 1'-biphenyl (19.3 mg, 0.10 mmol, 1.0 equiv) and morpholino benzoate (31.1 mg, 0.15 mmol, 1.5 equiv) according to the general procedure. Column chromatography purification (EtOAc : petroleum ether = 1 : 16) furnished the product **3g** as a light yellow solid (16 mg, 0.058 mmol, 58% yield).  $^1\text{H}$  NMR (400 MHz,  $\text{CDCl}_3$ ):  $\delta$  8.57 (d,  $J = 8.3$  Hz, 1H), 8.30 (d,  $J = 8.1$  Hz, 1H), 8.20 (d,  $J = 8.0$  Hz, 1H), 7.76 (t,  $J = 8.2$  Hz, 1H), 7.61 (t,  $J = 8.0$  Hz, 1H), 7.52 (d,  $J = 7.1$  Hz, 1H), 7.40 (t,  $J = 7.5$  Hz, 1H), 4.02 (t,  $J = 4.5$  Hz, 4H), 3.54 (t,  $J = 4.7$  Hz, 4H), 2.78 (s, 3H);  $^{13}\text{C}$  NMR (125 MHz,  $\text{CDCl}_3$ ):  $\delta$  158.5, 142.2, 136.6, 135.5, 130.0, 129.5, 126.6, 126.3, 124.5, 123.2, 122.4, 120.9, 119.7, 67.1, 51.8, 18.3; IR (KBr): 3021, 2958, 2917, 2884, 2852, 1610, 1576, 1522, 1458, 1273, 786  $\text{cm}^{-1}$ ; HRMS: calcd for  $\text{C}_{18}\text{H}_{18}\text{N}_2\text{O}$  ( $\text{M}+\text{H}^+$ ) 279.1492; found 279.1493; mp: 109-110  $^\circ\text{C}$ .

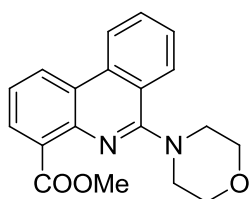

#### Methyl 6-morpholinophenanthridine-4-carboxylate (**3h**)

Prepared from methyl 2-isocyano-[1,1'-biphenyl]-3-carboxylate (23.7 mg, 0.10 mmol, 1.0 equiv) and morpholino benzoate (31.1 mg, 0.15 mmol, 1.5 equiv) according to the general procedure. Column chromatography purification (EtOAc : petroleum ether = 1 : 4) furnished the product **3h** as a white solid (21 mg, 0.066 mmol, 66% yield).  $^1\text{H}$  NMR (400 MHz,  $\text{CDCl}_3$ ):  $\delta$  8.53 (t,  $J = 8.2$  Hz, 1H), 8.15 (d,  $J = 8.1$

Hz, 1H), 7.86 (d,  $J = 7.3$  Hz, 1H), 7.78 (t,  $J = 7.3$  Hz, 1H), 7.63 (t,  $J = 7.3$  Hz, 1H), 7.48 (t,  $J = 7.8$  Hz, 1H), 4.03 (s, 3H), 3.98 (t,  $J = 4.5$  Hz, 4H), 3.57 (t,  $J = 4.7$  Hz, 4H);  $^{13}\text{C}$  NMR (125 MHz,  $\text{CDCl}_3$ ):  $\delta$  169.7, 159.6, 141.3, 134.8, 130.5, 128.8, 127.2, 126.5, 124.7, 123.8, 123.1, 122.9, 120.9, 67.0, 52.4, 51.5; IR (KBr): 3067, 2998, 2954, 2919, 2829, 1610, 1573, 1523, 1453, 1276, 768  $\text{cm}^{-1}$ ; HRMS: calcd for  $\text{C}_{19}\text{H}_{18}\text{N}_2\text{O}_3$  ( $\text{M}+\text{H}^+$ ) 323.1390; found 323.1391; mp: 110-112  $^\circ\text{C}$ .

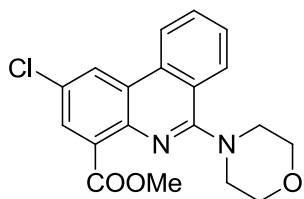

#### Methyl 2-chloro-6-morpholinophenanthridine-4-carboxylate (**3i**)

Prepared from methyl 5-chloro-2-isocyano-[1,1'-biphenyl]-3-carboxylate (27.2 mg, 0.10 mmol, 1.0 equiv) and morpholino benzoate (31.1 mg, 0.15 mmol, 1.5 equiv) according to the general procedure. Column chromatography purification (EtOAc : petroleum ether = 1 : 16) furnished the product **3i** as a white solid (24 mg, 0.067 mmol, 67% yield).  $^1\text{H}$  NMR (400 MHz,  $\text{CDCl}_3$ ):  $\delta$  8.45-8.43 (m, 2H), 8.14 (d,  $J = 8.0$  Hz, 1H), 7.81 (s, 1H), 7.78 (d,  $J = 8.3$  Hz, 1H), 7.66 (t,  $J = 7.2$  Hz, 1H), 4.02 (s, 3H), 3.96 (t,  $J = 4.5$  Hz, 4H), 3.57 (t,  $J = 4.7$  Hz, 4H);  $^{13}\text{C}$  NMR (125 MHz,  $\text{CDCl}_3$ ):  $\delta$  168.2, 159.7, 139.9, 133.9, 132.4, 130.8, 129.4, 129.0, 127.9, 126.6, 124.2, 123.1, 121.0, 66.9, 52.6, 51.5; IR (KBr): 3076, 2970, 2948, 2890, 2846, 1613, 1583, 1524, 1448, 1260, 758  $\text{cm}^{-1}$ ; HRMS: calcd for  $\text{C}_{19}\text{H}_{17}\text{ClN}_2\text{O}_3$  ( $\text{M}+\text{H}^+$ ) 357.1000; found 357.1002; mp: 131-133  $^\circ\text{C}$ .

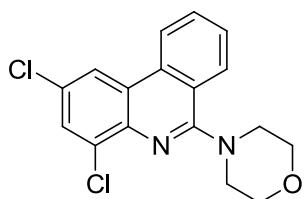

#### 4-(2,4-dichlorophenanthridin-6-yl)morpholine (**3j**)

Prepared from 3,5-dichloro-2-isocyano-1,1'-biphenyl (24.8 mg, 0.10 mmol, 1.0 equiv) and morpholino benzoate (31.1 mg, 0.15 mmol, 1.5 equiv) according to the general procedure. Column chromatography purification (EtOAc : petroleum ether = 1 : 16) furnished the product **3j** as a light yellow solid (22 mg, 0.066 mmol, 66% yield).  $^1\text{H}$  NMR (400 MHz,  $\text{CDCl}_3$ ):  $\delta$  8.45 (d,  $J = 8.2$  Hz, 1H), 8.28 (d,  $J = 2.2$  Hz,



1H), 8.17 (d,  $J = 7.9$  Hz, 1H), 7.80 (t,  $J = 8.2$  Hz, 1H), 7.71 (d,  $J = 2.2$  Hz, 1H), 7.68 (d,  $J = 8.0$  Hz, 1H), 4.00 (t,  $J = 4.5$  Hz, 4H), 3.62 (t,  $J = 4.5$  Hz, 4H);  $^{13}\text{C}$  NMR (125 MHz,  $\text{CDCl}_3$ ):  $\delta$  159.9, 138.9, 134.2, 133.8, 130.9, 129.6, 129.3, 127.9, 126.7, 124.7, 123.4, 121.3, 120.5, 66.9, 51.7; IR (KBr): 3082, 2970, 2916, 2863, 2848, 1611, 1583, 1517, 1444, 1272, 703  $\text{cm}^{-1}$ ; HRMS: calcd for  $\text{C}_{17}\text{H}_{14}\text{Cl}_2\text{N}_2\text{O}$  ( $\text{M}+\text{H}^+$ ) 333.0556; found 333.0557; mp: 204-206  $^\circ\text{C}$ .

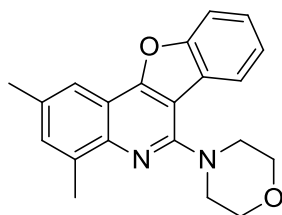

#### 2,4-dimethyl-6-morpholinobenzofuro[3,2-*c*]quinolone (**3k**)

Prepared from 2-(2-isocyano-3,5-dimethylphenyl)benzofuran (24.7 mg, 0.10 mmol, 1.0 equiv) and morpholino benzoate (31.1 mg, 0.15 mmol, 1.5 equiv) according to the general procedure. Column chromatography purification (EtOAc : petroleum ether = 1 : 16) furnished the product **3k** as a light yellow solid (21 mg, 0.061 mmol, 61% yield).  $^1\text{H}$  NMR (400 MHz,  $\text{CDCl}_3$ ):  $\delta$  7.93 (s, 1H), 7.84 (d,  $J = 7.6$  Hz, 1H), 7.72 (d,  $J = 7.9$  Hz, 1H), 7.51-7.43 (m, 2H), 7.39 (s, 1H), 4.05 (t,  $J = 4.5$  Hz, 4H), 3.64 (t,  $J = 4.5$  Hz, 4H), 2.75 (s, 3H), 2.54 (s, 3H);  $^{13}\text{C}$  NMR (125 MHz,  $\text{CDCl}_3$ ):  $\delta$  159.7, 155.8, 154.9, 143.7, 136.0, 133.9, 132.1, 126.2, 123.9, 123.0, 122.2, 117.7, 114.9, 111.9, 108.5, 67.1, 49.9, 21.7, 18.4; IR (KBr): 3030, 2950, 2913, 2857, 2819, 1634, 1594, 1507, 1435, 1275, 752  $\text{cm}^{-1}$ ; HRMS: calcd for  $\text{C}_{21}\text{H}_{20}\text{N}_2\text{O}_2$  ( $\text{M}+\text{H}^+$ ) 333.1598; found 333.1596; mp: 107-109  $^\circ\text{C}$ .

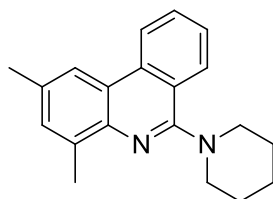

#### 2,4-dimethyl-6-(piperidin-1-yl)phenanthridine (**3l**)

Prepared from 2-isocyano-3,5-dimethyl-1,1'-biphenyl (20.7 mg, 0.10 mmol, 1.0 equiv) and piperidin-1-yl benzoate (30.8 mg, 0.15 mmol, 1.5 equiv) according to the general procedure. Column chromatography purification (EtOAc : petroleum ether = 1 : 60) furnished the product **3l** as a light yellow solid (24 mg, 0.081 mmol, 81%

yield).  $^1\text{H}$  NMR (400 MHz,  $\text{CDCl}_3$ ):  $\delta$  8.53 (d,  $J = 8.2$  Hz, 1H), 8.19 (d,  $J = 8.0$  Hz, 1H), 8.08 (s, 1H), 7.72 (t,  $J = 7.2$  Hz, 1H), 7.58 (t,  $J = 7.2$  Hz, 1H), 7.35 (s, 1H), 3.46 (t,  $J = 5.1$  Hz, 4H), 2.75 (s, 3H), 2.54 (s, 3H), 1.91-1.85 (m, 4H), 1.76-1.71 (m, 2H);  $^{13}\text{C}$  NMR (125 MHz,  $\text{CDCl}_3$ ):  $\delta$  159.2, 140.7, 136.1, 135.2, 133.4, 131.0, 129.6, 126.7, 126.2, 122.9, 122.1, 121.6, 119.4, 52.7, 26.3, 25.2, 21.9, 18.1; IR (KBr): 3068, 2967, 2928, 2854, 1646, 1610, 1584, 1520, 1464, 1264, 774  $\text{cm}^{-1}$ ; HRMS: calcd for  $\text{C}_{20}\text{H}_{22}\text{N}_2$  ( $\text{M}+\text{H}^+$ ) 291.1856; found 291.1852; mp: 97-99  $^\circ\text{C}$ .

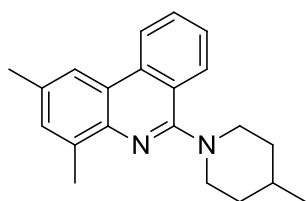

### 2,4-dimethyl-6-(4-methylpiperidin-1-yl)phenanthridine (**3m**)

Prepared from 2-isocyano-3, 5-dimethyl-1, 1'-biphenyl (20.7 mg, 0.10 mmol, 1.0 equiv) and 4-methylpiperidin-1-yl benzoate (32.9 mg, 0.15 mmol, 1.5 equiv) according to the general procedure. Column chromatography purification (EtOAc : petroleum ether = 1 : 60) furnished the product **3m** as a light yellow solid (21 mg, 0.070 mmol, 70% yield).  $^1\text{H}$  NMR (400 MHz,  $\text{CDCl}_3$ ):  $\delta$  8.53 (d,  $J = 8.2$  Hz, 1H), 8.18 (d,  $J = 8.2$  Hz, 1H), 8.08 (s, 1H), 7.72 (t,  $J = 7.7$  Hz, 1H), 7.58 (t,  $J = 7.7$  Hz, 1H), 7.35 (s, 1H), 3.94 (d,  $J = 13.2$  Hz, 1H), 3.01 (t,  $J = 12.6$  Hz, 4H), 2.75 (s, 3H), 2.54 (s, 3H), 1.90-1.80 (m, 2H), 1.74-1.52 (m, 3H), 1.09 (d,  $J = 6.1$  Hz, 3H);  $^{13}\text{C}$  NMR (125 MHz,  $\text{CDCl}_3$ ):  $\delta$  158.9, 140.7, 136.1, 135.1, 133.4, 131.0, 129.6, 126.7, 126.2, 122.9, 122.1, 121.6, 119.4, 51.9, 34.7, 31.6, 22.3, 21.9, 18.2; IR (KBr): 3069, 2955, 2922, 2861, 2826, 1609, 1574, 1520, 1453, 1281, 773  $\text{cm}^{-1}$ ; HRMS: calcd for  $\text{C}_{21}\text{H}_{24}\text{N}_2$  ( $\text{M}+\text{H}^+$ ) 305.2012; found 305.2011; mp: 96-98  $^\circ\text{C}$ .

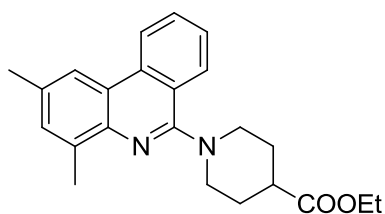

### Ethyl 1-(2,4-dimethylphenanthridin-6-yl)piperidine-4-carboxylate (**3n**)

Prepared from 2-isocyano-3, 5-dimethyl-1, 1'-biphenyl (20.7 mg, 0.10 mmol, 1.0 equiv) and ethyl 1-(benzoyloxy)piperidine-4-carboxylate (41.6 mg, 0.15 mmol, 1.5

equiv) according to the general procedure. Column chromatography purification (EtOAc : petroleum ether = 1 : 16) furnished the product **3n** as a light yellow oil (18 mg, 0.050 mmol, 50% yield). <sup>1</sup>H NMR (400 MHz, CDCl<sub>3</sub>): δ 8.53 (d, *J* = 8.2 Hz, 1H), 8.17 (d, *J* = 8.2 Hz, 1H), 8.07 (s, 1H), 7.72 (t, *J* = 7.7 Hz, 1H), 7.58 (t, *J* = 7.7 Hz, 1H), 7.34 (s, 1H), 4.21 (q, *J* = 7.1 Hz, 2H), 3.95-3.90 (m, 2H), 3.10-3.03 (m, 2H), 2.73 (s, 3H), 2.63-2.57 (m, 1H), 2.53 (s, 3H), 2.14-2.08 (m, 4H), 1.32 (t, *J* = 7.1 Hz, 3H); <sup>13</sup>C NMR (125 MHz, CDCl<sub>3</sub>): δ 175.4, 158.6, 140.5, 136.2, 135.1, 133.7, 131.1, 129.7, 126.4, 126.3, 122.9, 122.2, 121.4, 119.4, 60.5, 51.1, 41.9, 28.6, 21.9, 18.1, 14.4; IR (KBr): 3071, 2955, 2923, 2854, 2820, 1610, 1576, 1521, 1446, 1289, 776 cm<sup>-1</sup>; HRMS: calcd for C<sub>23</sub>H<sub>26</sub>N<sub>2</sub>O<sub>2</sub> (M+H<sup>+</sup>) 363.2067; found 363.2070.

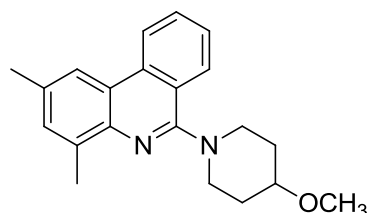

#### 6-(4-methoxypiperidin-1-yl)-2,4-dimethylphenanthridine (**3o**)

Prepared from 2-isocyano-3,5-dimethyl-1,1'-biphenyl (20.7 mg, 0.10 mmol, 1.0 equiv) and 4-methoxypiperidin-1-yl benzoate (35.3 mg, 0.15 mmol, 1.5 equiv) according to the general procedure. Column chromatography purification (EtOAc : petroleum ether = 1 : 16) furnished the product **3o** as a white solid (18 mg, 0.057 mmol, 57% yield). <sup>1</sup>H NMR (400 MHz, CDCl<sub>3</sub>): δ 8.53 (d, *J* = 8.2 Hz, 1H), 8.17 (d, *J* = 8.1 Hz, 1H), 8.07 (s, 1H), 7.72 (t, *J* = 7.1 Hz, 1H), 7.58 (t, *J* = 7.1 Hz, 1H), 7.34 (s, 1H), 3.86-3.80 (m, 2H), 3.49-3.47 (m, 1H), 3.44 (s, 3H), 3.22-3.15 (m, 2H), 2.73 (s, 3H), 2.53 (s, 3H), 2.19-2.15 (m, 2H), 1.94-1.84 (m, 2H); <sup>13</sup>C NMR (125 MHz, CDCl<sub>3</sub>): δ 158.5, 140.5, 136.2, 135.1, 133.6, 131.1, 129.7, 126.5, 126.4, 122.9, 122.2, 121.4, 119.4, 55.8, 49.2, 31.3, 21.9, 18.2; IR (KBr): 3019, 2953, 2924, 2854, 1719, 1599, 1576, 1504, 1455, 1272, 768 cm<sup>-1</sup>; HRMS: calcd for C<sub>21</sub>H<sub>24</sub>N<sub>2</sub>O (M+H<sup>+</sup>) 321.1961; found 321.1966; mp: 108-110 °C.

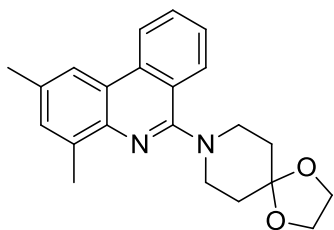

8-(2,4-dimethylphenanthridin-6-yl)-1,4-dioxa-8-azaspiro[4.5]decane (**3p**)

Prepared from 2-isocyano-3,5-dimethyl-1,1'-biphenyl (20.7 mg, 0.10 mmol, 1.0 equiv) and 1,4-dioxa-8-azaspiro[4.5]decan-8-yl benzoate (39.5 mg, 0.15 mmol, 1.5 equiv) according to the general procedure. Column chromatography purification (EtOAc : petroleum ether = 1 : 16) furnished the product **3p** as a light yellow solid (22 mg, 0.064 mmol, 64% yield). <sup>1</sup>H NMR (400 MHz, CDCl<sub>3</sub>): δ 8.54 (d, *J* = 8.3 Hz, 1H), 8.18 (d, *J* = 8.2 Hz, 1H), 8.07 (s, 1H), 7.73 (t, *J* = 7.6 Hz, 1H), 7.59 (t, *J* = 7.6 Hz, 1H), 7.34 (s, 1H), 4.04 (s, 4H), 3.63 (t, *J* = 5.4 Hz, 4H), 2.73 (s, 3H), 2.54 (s, 3H), 2.03 (t, *J* = 5.7 Hz, 4H); <sup>13</sup>C NMR (125 MHz, CDCl<sub>3</sub>): δ 158.1, 140.5, 136.2, 135.2, 133.6, 131.1, 129.7, 126.4, 126.3, 122.9, 122.1, 121.3, 119.3, 107.9, 64.5, 49.4, 35.2, 21.9, 18.2; IR (KBr): 3071, 2979, 2918, 2856, 2838, 1611, 1582, 1521, 1454, 1277, 758 cm<sup>-1</sup>; HRMS: calcd for C<sub>22</sub>H<sub>24</sub>N<sub>2</sub>O<sub>2</sub> (M+H<sup>+</sup>) 349.1911; found 349.1910; mp: 125-127 °C.

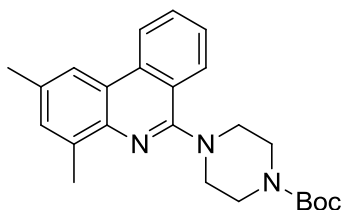

*tert*-butyl 4-(2,4-dimethylphenanthridin-6-yl)piperazine-1-carboxylate (**3q**)

Prepared from 2-isocyano-3,5-dimethyl-1,1'-biphenyl (20.7 mg, 0.10 mmol, 1.0 equiv) and *tert*-butyl 4-(benzoyloxy)piperazine-1-carboxylate (45.9 mg, 0.15 mmol, 1.5 equiv) according to the general procedure. Column chromatography purification (EtOAc : petroleum ether = 1 : 16) furnished the product **3q** as a light yellow solid (27 mg, 0.070 mmol, 70% yield). <sup>1</sup>H NMR (400 MHz, CDCl<sub>3</sub>): δ 8.55 (d, *J* = 8.2 Hz, 1H), 8.19 (d, *J* = 8.1 Hz, 1H), 8.08 (s, 1H), 7.74 (t, *J* = 7.7 Hz, 1H), 7.59 (t, *J* = 7.7 Hz, 1H), 7.35 (s, 1H), 3.74 (t, *J* = 5.1 Hz, 4H), 3.46 (t, *J* = 4.8 Hz, 4H), 2.73 (s, 3H), 2.54 (s, 3H), 1.52 (s, 9H); <sup>13</sup>C NMR (125 MHz, CDCl<sub>3</sub>): δ 157.9, 155.1, 140.3, 136.3, 135.2, 134.1, 131.2, 129.9, 126.5, 126.2, 123.1, 122.3, 121.1, 119.4, 79.9, 51.2, 43.3, 28.6,

21.9, 18.2; IR (KBr): 3067, 2961, 2925, 2893, 2845, 1608, 1573, 1520, 1452, 1274, 773  $\text{cm}^{-1}$ ; HRMS: calcd for  $\text{C}_{24}\text{H}_{29}\text{N}_3\text{O}_2$  ( $\text{M}+\text{H}^+$ ) 392.2333; found 392.2332. mp: 139-141  $^{\circ}\text{C}$ .

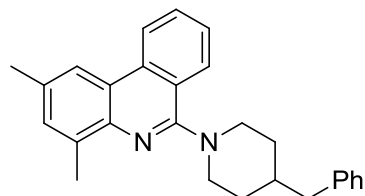

### 6-(4-benzylpiperidin-1-yl)-2,4-dimethylphenanthridine (**3r**)

Prepared from 2-isocyano-3,5-dimethyl-1,1'-biphenyl (20.7 mg, 0.10 mmol, 1.0 equiv) and 4-benzylpiperidin-1-yl benzoate (44.3 mg, 0.15 mmol, 1.5 equiv) according to the general procedure. Column chromatography purification (EtOAc : petroleum ether = 1 : 16) furnished the product **3r** as a light yellow solid (26 mg, 0.068 mmol, 68% yield).  $^1\text{H}$  NMR (400 MHz,  $\text{CDCl}_3$ ):  $\delta$  8.53 (d,  $J = 8.2$  Hz, 1H), 8.18 (d,  $J = 8.0$  Hz, 1H), 8.08 (s, 1H), 7.72 (t,  $J = 7.2$  Hz, 1H), 7.58 (t,  $J = 7.2$  Hz, 1H), 7.35-7.31 (m, 3H), 7.25-7.23 (m, 3H), 3.95 (d,  $J = 12.9$  Hz, 2H), 2.97 (t,  $J = 12.1$  Hz, 2H), 2.73 (s, 3H), 2.69 (d,  $J = 6.6$  Hz, 2H), 2.54 (s, 3H), 1.87-1.84 (m, 3H), 1.71-1.60 (m, 2H);  $^{13}\text{C}$  NMR (125 MHz,  $\text{CDCl}_3$ ):  $\delta$  158.9, 140.9, 140.6, 136.1, 135.1, 133.5, 131.0, 129.6, 129.3, 128.4, 126.6, 126.2, 125.9, 122.9, 122.1, 121.5, 119.4, 51.9, 43.6, 38.8, 32.6, 21.9, 18.1; IR (KBr): 3070, 2981, 2914, 2849, 2822, 1608, 1573, 1520, 1444, 1284, 774  $\text{cm}^{-1}$ ; HRMS: calcd for  $\text{C}_{27}\text{H}_{28}\text{N}_2$  ( $\text{M}+\text{H}^+$ ) 381.2325; found 381.2327; mp: 101-103  $^{\circ}\text{C}$ .

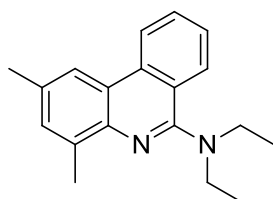

### *N,N*-diethyl-2,4-dimethylphenanthridin-6-amine (**3s**)

Prepared from 2-isocyano-3,5-dimethyl-1,1'-biphenyl (20.7 mg, 0.10 mmol, 1.0 equiv) and *O*-benzoyl-*N,N*-diethylhydroxylamine (28.9 mg, 0.15 mmol, 1.5 equiv) according to the general procedure. Column chromatography purification (EtOAc : petroleum ether = 1 : 60) furnished the product **3s** as a light yellow oil (13 mg, 0.047 mmol, 47% yield).  $^1\text{H}$  NMR (400 MHz,  $\text{CDCl}_3$ ):  $\delta$  8.54 (d,  $J = 8.2$  Hz, 1H), 8.21 (d,  $J$

= 8.2 Hz, 1H), 8.08 (s, 1H), 7.72 (t,  $J = 8.2$  Hz, 1H), 7.57 (t,  $J = 7.1$  Hz, 1H), 7.35 (s, 1H), 3.53 (q,  $J = 7.0$  Hz, 4H), 2.74 (s, 3H), 2.54 (s, 3H), 1.29 (t,  $J = 7.0$  Hz, 6H), ;  $^{13}\text{C}$  NMR (125 MHz,  $\text{CDCl}_3$ ):  $\delta$  157.6, 140.6, 136.0, 135.2, 133.2, 130.9, 129.5, 126.5, 126.1, 122.9, 122.5, 121.8, 119.3, 46.1, 21.9, 18.2, 13.2; IR (KBr): 3072, 2965, 2921, 2852, 1728, 1611, 1574, 1520, 1455, 1288, 773  $\text{cm}^{-1}$ ; HRMS: calcd for  $\text{C}_{19}\text{H}_{22}\text{N}_2$  ( $\text{M}+\text{H}^+$ ) 279.1856; found 279.1852.

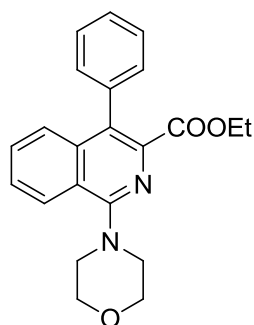

#### Ethyl 1-morpholino-4-phenylisoquinoline-3-carboxylate (**5a**)

Prepared from ethyl 2-isocyano-3,3-diphenylacrylate (27.7 mg, 0.10 mmol, 1.0 equiv) and morpholino benzoate (31.1 mg, 0.15 mmol, 1.5 equiv) according to the general procedure. Column chromatography purification (EtOAc : petroleum ether = 1 : 8) furnished the product **5a** as a light yellow solid (22 mg, 0.061 mmol, 61% yield).  $^1\text{H}$  NMR (400 MHz,  $\text{CDCl}_3$ ):  $\delta$  8.17-8.14 (m, 1H), 7.58-7.57 (m, 3H), 7.46-7.42 (m, 3H), 7.34-7.31 (m, 2H), 4.07 (q,  $J = 7.1$  Hz, 2H), 3.99 (t,  $J = 4.2$  Hz, 4H), 3.53 (t,  $J = 4.2$  Hz, 4H), 0.93 (t,  $J = 7.1$  Hz, 3H);  $^{13}\text{C}$  NMR (125 MHz,  $\text{CDCl}_3$ ):  $\delta$  167.9, 160.4, 140.7, 137.9, 136.7, 130.4, 130.2, 128.3, 128.1, 127.8, 127.3, 127.1, 125.5, 121.9, 67.2, 61.1, 51.9, 13.7; IR (KBr): 3010, 2953, 2924, 2854, 1719, 1599, 1576, 1504, 1455, 1272, 768  $\text{cm}^{-1}$ ; HRMS: calcd for  $\text{C}_{22}\text{H}_{22}\text{N}_2\text{O}_3$  ( $\text{M}+\text{H}^+$ ) 363.1703; found 363.1700; mp: 189-191  $^\circ\text{C}$ .

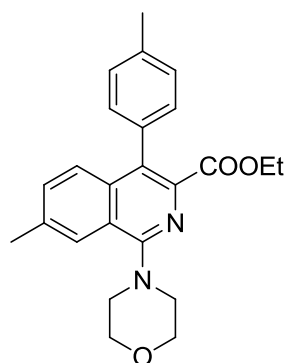

Ethyl 7-methyl-1-morpholino-4-(*p*-tolyl)isoquinoline-3-carboxylate (**5b**)

Prepared from ethyl 2-isocyano-3,3-di-*p*-tolylacrylate (30.5 mg, 0.10 mmol, 1.0 equiv) and morpholino benzoate (31.1 mg, 0.15 mmol, 1.5 equiv) according to the general procedure. Column chromatography purification (EtOAc : petroleum ether = 1 : 8) furnished the product **5b** as a light yellow solid (21 mg, 0.054 mmol, 54% yield). <sup>1</sup>H NMR (400 MHz, CDCl<sub>3</sub>): δ 7.83 (s, 1H), 7.42 (d, *J* = 8.6 Hz, 1H), 7.30 (d, *J* = 8.6 Hz, 1H), 7.18 (d, *J* = 8.0 Hz, 2H), 7.11 (d, *J* = 8.0 Hz, 2H), 4.01 (q, *J* = 7.2 Hz, 2H), 3.91 (t, *J* = 4.5 Hz, 4H), 3.41 (t, *J* = 4.7 Hz, 4H), 2.46 (s, 3H), 2.35 (s, 3H), 0.89 (t, *J* = 7.2 Hz, 3H); <sup>13</sup>C NMR (125 MHz, CDCl<sub>3</sub>): δ 168.1, 159.7, 139.9, 137.4, 137.3, 136.2, 133.8, 132.2, 130.1, 128.9, 128.5, 127.1, 124.4, 122.2, 67.2, 61.1, 51.9, 22.1, 21.4, 13.8; IR (KBr): 3025, 2977, 2921, 2882, 2850, 1646, 1573, 1518, 1441, 1276, 739 cm<sup>-1</sup>; HRMS: calcd for C<sub>24</sub>H<sub>26</sub>N<sub>2</sub>O<sub>3</sub> (M+H<sup>+</sup>) 391.2016; found 391.2019; mp: 105-107 °C.

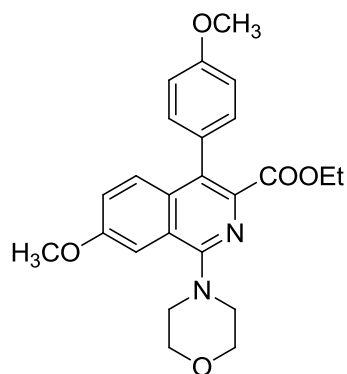

Ethyl 7-methoxy-4-(4-methoxyphenyl)-1-morpholinoisoquinoline-3-carboxylate (**5c**)

Prepared from ethyl 3,3-bis(4-chlorophenyl)-2-isocyanoacrylate (33.7 mg, 0.10 mmol, 1.0 equiv) and morpholino benzoate (31.05 mg, 0.15 mmol, 1.5 equiv) according to the general procedure. Column chromatography purification (EtOAc : petroleum ether = 1 : 8) furnished the product **5c** as a light yellow solid (26 mg, 0.062 mmol, 62% yield). <sup>1</sup>H NMR (400 MHz, CDCl<sub>3</sub>): δ 7.53 (d, *J* = 9.2 Hz, 1H), 7.45 (s, 1H), 7.22 (d, *J* = 8.5 Hz, 2H), 6.98 (d, *J* = 8.7 Hz, 2H), 4.10 (q, *J* = 7.1 Hz, 2H), 3.99 (t, *J* = 4.4 Hz, 4H), 3.95 (s, 3H), 3.87 (s, 3H), 3.48 (t, *J* = 4.6 Hz, 4H), 1.00 (t, *J* = 7.1 Hz, 3H); <sup>13</sup>C NMR (125 MHz, CDCl<sub>3</sub>): δ 168.2, 159.4, 159.1, 158.8, 139.0, 133.2, 131.3, 128.9, 128.6, 123.6, 121.9, 113.8, 104.4, 67.2, 61.0, 55.6, 55.5, 51.6, 13.9; IR (KBr): 3030, 2982, 2966, 2920, 2846, 1646, 1582, 1517, 1444, 1272, 835 cm<sup>-1</sup>; HRMS: calcd for C<sub>24</sub>H<sub>26</sub>N<sub>2</sub>O<sub>5</sub> (M+H<sup>+</sup>) 423.1914; found 423.1912; mp: 133-135 °C.

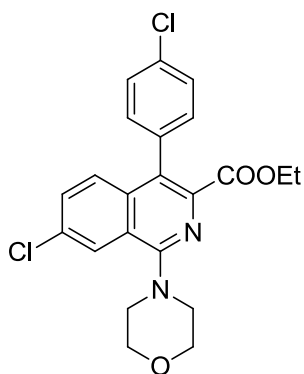

Ethyl 7-chloro-4-(4-chlorophenyl)-1-morpholinoisoquinoline-3-carboxylate (**5d**)

Prepared from ethyl 3,3-bis(4-chlorophenyl)-2-isocyanoacrylate (34.6 mg, 0.10 mmol, 1.0 equiv) and morpholino benzoate (31.1 mg, 0.15 mmol, 1.5 equiv) according to the general procedure. Column chromatography purification (EtOAc : petroleum ether = 1 : 8) furnished the product **5d** as a light yellow solid (16 mg, 0.037 mmol, 37% yield).  $^1\text{H}$  NMR (400 MHz,  $\text{CDCl}_3$ ):  $\delta$  8.10 (s, 1H), 7.52 (d,  $J = 9.0$  Hz, 1H), 7.48-7.43 (m, 3H), 7.24 (d,  $J = 8.4$  Hz, 2H), 4.11 (q,  $J = 7.2$  Hz, 2H), 3.99 (t,  $J = 4.5$  Hz, 4H), 3.51 (t,  $J = 4.6$  Hz, 4H), 1.02 (t,  $J = 7.2$  Hz, 3H);  $^{13}\text{C}$  NMR (125 MHz,  $\text{CDCl}_3$ ):  $\delta$  167.3, 159.7, 140.9, 136.2, 134.7, 134.2, 133.7, 131.6, 131.3, 128.7, 128.6, 126.7, 124.7, 122.7, 67.0, 61.4, 51.8, 13.9; IR (KBr): 3020, 2961, 2920, 2851, 1736, 1573, 1562, 1543, 1445, 1267, 782  $\text{cm}^{-1}$ ; HRMS: calcd for  $\text{C}_{22}\text{H}_{20}\text{Cl}_2\text{N}_2\text{O}_3$  ( $\text{M}+\text{H}^+$ ) 431.0924; found 431.0928; mp: 89-91  $^\circ\text{C}$ .

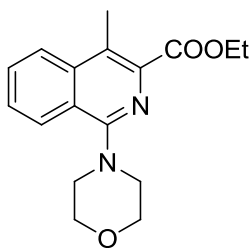

Ethyl 4-methyl-1-morpholinoisoquinoline-3-carboxylate (**5e**)

Prepared from (*Z*)-ethyl 2-isocyano-3-phenylbut-2-enoate (21.5 mg, 0.10 mmol, 1.0 equiv) and morpholino benzoate (31.05 mg, 0.15 mmol, 1.5 equiv) according to the general procedure. Column chromatography purification (EtOAc : petroleum ether = 1 : 8) furnished the product **5e** as a light yellow oil (10 mg, 0.031 mmol, 31% yield).  $^1\text{H}$  NMR (400 MHz,  $\text{CDCl}_3$ ):  $\delta$  8.14 (d,  $J = 8.1$  Hz, 1H), 8.04 (d,  $J = 8.4$  Hz, 1H), 7.71 (t,  $J = 8.4$  Hz, 1H), 7.59 (t,  $J = 8.1$  Hz, 1H), 4.46 (q,  $J = 7.1$  Hz, 2H), 3.96 (t,  $J = 4.5$  Hz, 4H), 3.42 (t,  $J = 4.7$  Hz, 4H), 2.69 (s, 3H), 1.44 (t,  $J = 7.1$  Hz, 3H);  $^{13}\text{C}$  NMR



(125 MHz, CDCl<sub>3</sub>): δ 168.3, 159.2, 140.3, 138.2, 130.1, 127.2, 125.8, 124.9, 122.9, 122.1, 67.2, 61.4, 51.9, 14.4, 14.0; IR (KBr): 3073, 2959, 2921, 2850, 1721, 1615, 1579, 1504, 1441, 1273, 767 cm<sup>-1</sup>; HRMS: calcd for C<sub>17</sub>H<sub>20</sub>N<sub>2</sub>O<sub>3</sub> (M+H<sup>+</sup>) 301.1547; found 301.1549.



3b

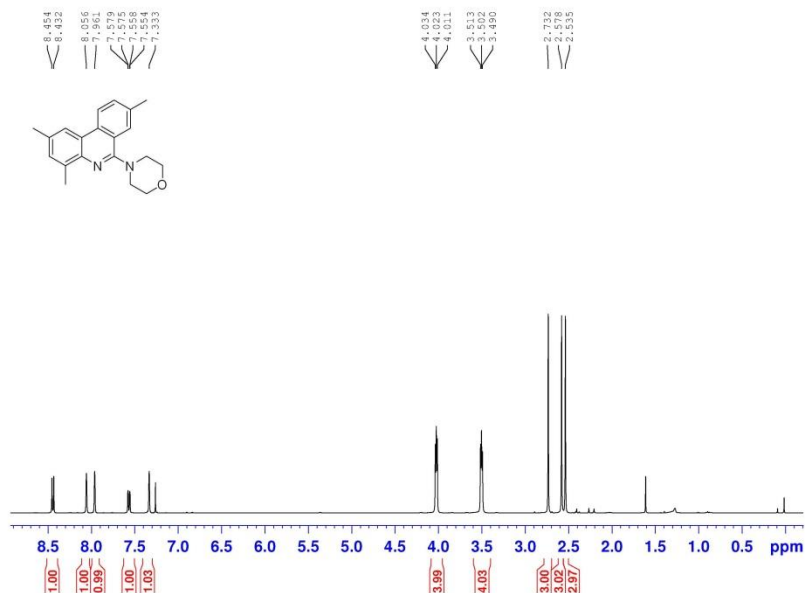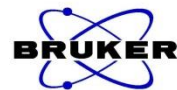

```

NAME      F1003473-3
EXPNO     1
PROCNO    1
Date_     20161119
Time      0.35
INSTRUM   spect
PROBHD    5 mm DOL-13C-1
PULPROG   zgpg30
TD         65536
SOLVENT   CDCl3
NS         16
DS         4
SWH        6279.146 Hz
FIDRES    0.1232114 Hz
AQ         3.9584243 sec
RG         114
SQ         1.14
WDW        60.400 usec
SSB        0.50 usec
GB         0.0000000
PC         296.0 K
DL         1.00000000 sec
TD0        1
  
```

----- CHANNEL f1 -----

```

NUC1       13C
P1         12.58 usec
PL1        0.00 dB
PL12       19.87646866 W
SFO1       400.1254119 MHz
SI         32768
SF         400.1300000 MHz
WDW        EM
SSB        0
GB         0.30 Hz
PC         1.00
  
```

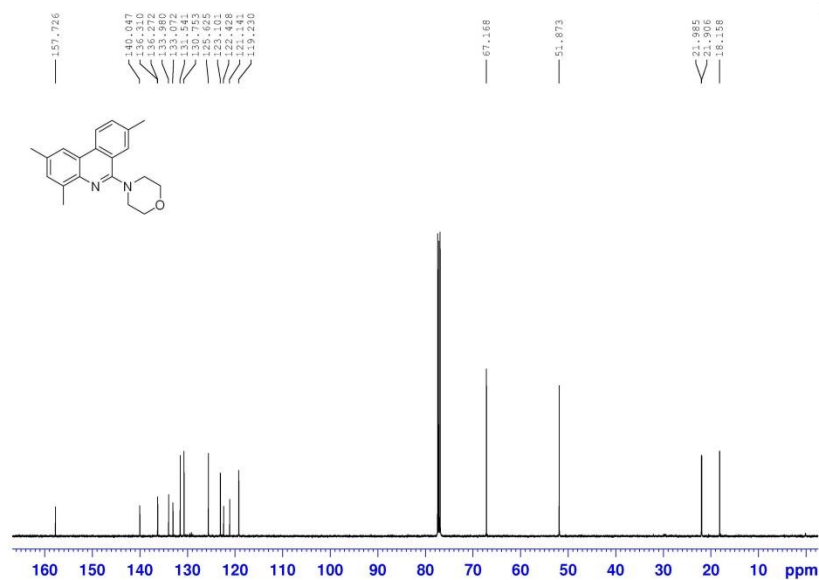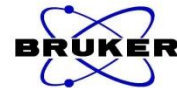

```

NAME      F1003473-3
EXPNO     1
PROCNO    1
Date_     20161119
Time      22.46
INSTRUM   spect
PROBHD    5 mm PABBO QNP
PULPROG   zgpg30
TD         65536
SOLVENT   CDCl3
NS         2048
DS         4
SWH        29761.908 Hz
FIDRES    0.454131 Hz
AQ         1.1010518 sec
RG         203
SQ         16.850 usec
WDW        6.50 usec
SSB        0.0000000
GB         0.0000000
PC         2.00000000 sec
TD0        0.03000000 sec
  
```

----- CHANNEL f1 -----

```

NUC1       13C
P1         13.84 usec
PL1        2.50 dB
PL12       46.49624796 W
SFO1       125.7703643 MHz
  
```

----- CHANNEL f2 -----

```

CPDPRG2   waltz16
NUC2       1H
PCPD2     80.00 usec
PL2        1.50 dB
PL12       11.40 dB
PL13       11.40 dB
PL14       11.40 dB
PL15       13.02355888 W
PL16       0.42143536 W
PL17       0.42143536 W
SFO2       500.1320000 MHz
SI         32768
SF         125.7677153 MHz
WDW        EM
SSB        0
GB         1.00 Hz
PC         1.40
  
```

3c

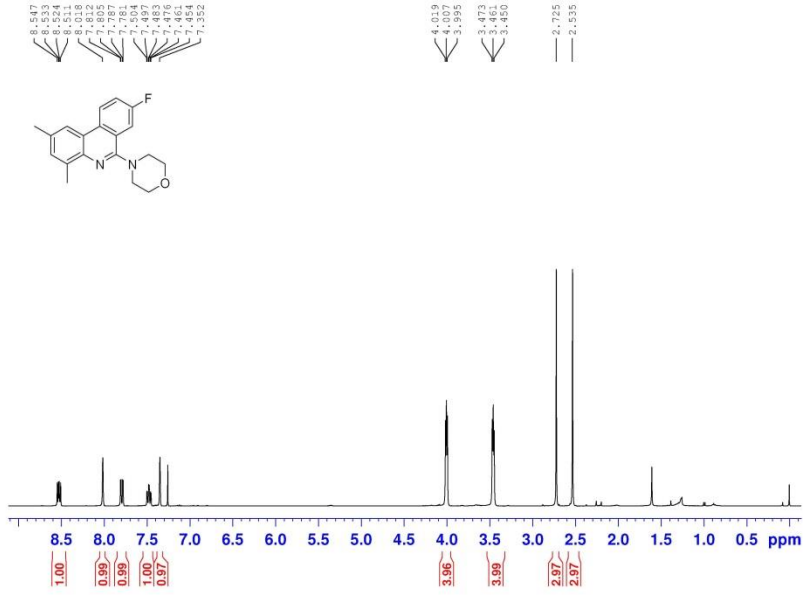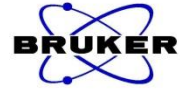

```
NAME F1003477-3
EXPNO 1
PROCNO 1
Date_ 20161227
Time 0.40
INSTRUM spect
PROBHD 5 mm DOL-13C-1
PULPROG zgpg30
TD 65536
SOLVENT CDCl3
NS 16
DS 4
SWH 8278.146 Hz
FIDRES 0.126214 Hz
AQ 3.9584243 sec
RG 319
OR 0
DE 60.400 usec
QE 6.50 usec
RF 295.9 F
DL 1.00000000 sec
TD 1
```

----- CHANNEL f1 -----

```
NUC1 13C
P1 12.58 usec
PL1 0.00 dB
PL12 19.87644866 W
SFO1 400.1320005 MHz
SI 32768
SF 400.1320005 MHz
WDW EM
SSB 0
LB 0.30 Hz
GB 0
PC 1.00
```

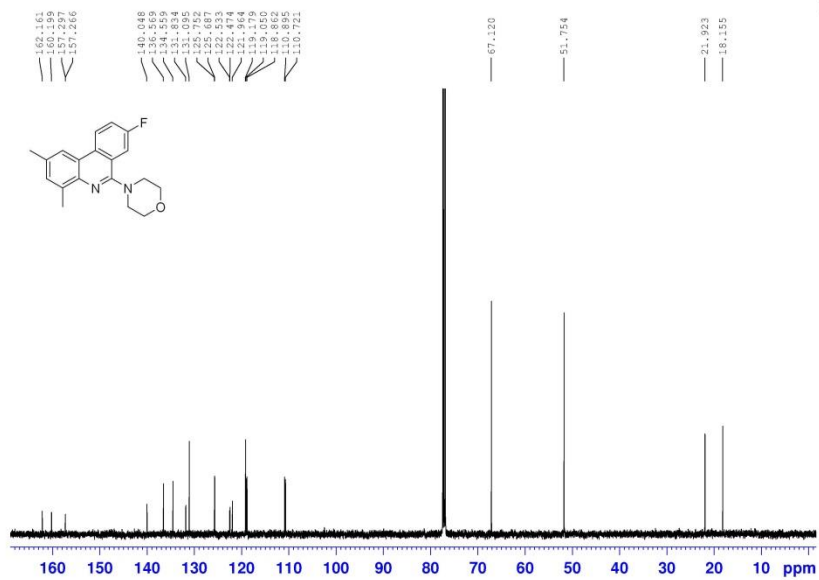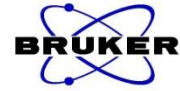

```
NAME F1003477-3
EXPNO 109
PROCNO 1
Date_ 20161227
Time 11.44
INSTRUM spect
PROBHD 5 mm PABBO DE
PULPROG zgpg30
TD 65536
SOLVENT CDCl3
NS 1624
DS 4
SWH 29761.900 Hz
FIDRES 0.454131 Hz
AQ 1.1010518 sec
RG 203
OR 0
DE 16.800 usec
QE 6.50 usec
RF 295.9 F
DL 2.00000000 sec
TD 0.03000000 sec
```

----- CHANNEL f1 -----

```
NUC1 13C
P1 13.84 usec
PL1 2.50 dB
PL12 46.49624756 W
SFO1 125.7703643 MHz
```

----- CHANNEL f2 -----

```
CPDPRG2 waltz16
NUC1 1H
PCPD2 80.00 usec
PL1 1.50 dB
PL12 11.40 dB
PL13 11.40 dB
PL14 11.40 dB
PL15 11.40 dB
PL16 13.02355888 W
PL17 0.42143536 W
PL18 0.42143536 W
SFO2 300.1320005 MHz
SI 32768
SF 125.7677129 MHz
WDW EM
SSB 0
LB 1.00 Hz
GB 0
PC 1.40
```

3d

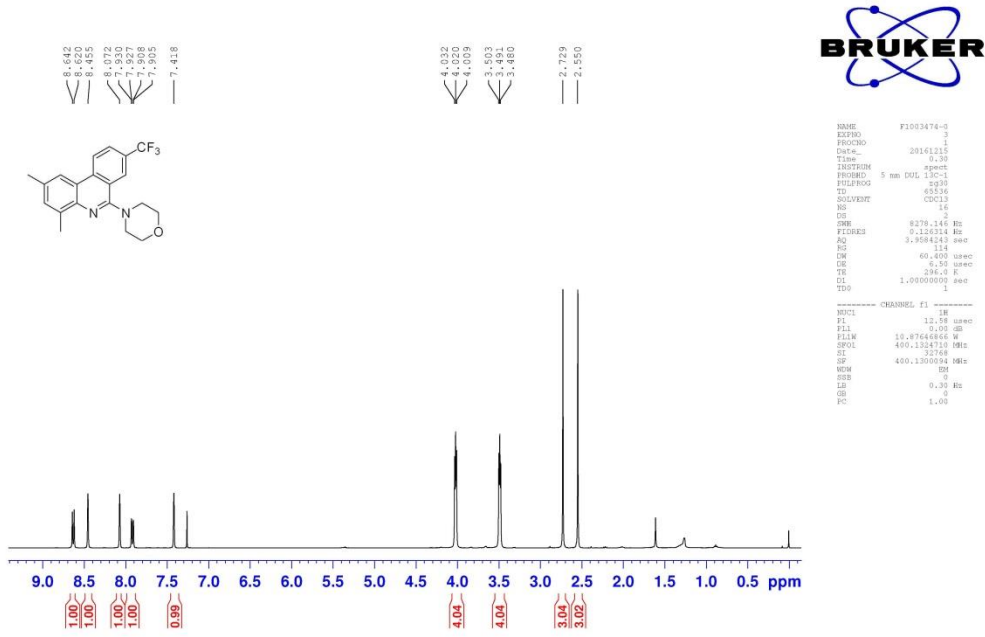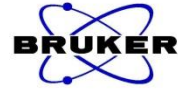

```

NAME      F1003474-3
EXPNO    1
PROCNO   1
Date_    20161219
Time     0.39
INSTRUM  spect
PROBHD   5 mm DOL-13C-1
PULPROG  zgpg30
TD        65536
SOLVENT  CDCl3
NS        16
DS        4
SWH      6279.146 Hz
FIDRES   0.123214 Hz
AQ        3.9584243 sec
RG        114
DE        1.44
CE        60.400 usec
CF        6.50 usec
CR        296.0 F
DL        1.00000000 sec
DQ        1
VDD
  
```

```

----- CHANNEL f1 -----
NUC1      13C
P1        12.58 usec
PL        0.00 dB
PL1W     19.8764686 W
SFO1     400.125418 MHz
SI        32768
SF        400.1300974 MHz
WDW       EM
SSB       0
LB        0.30 Hz
GB        0
PC        1.00
  
```

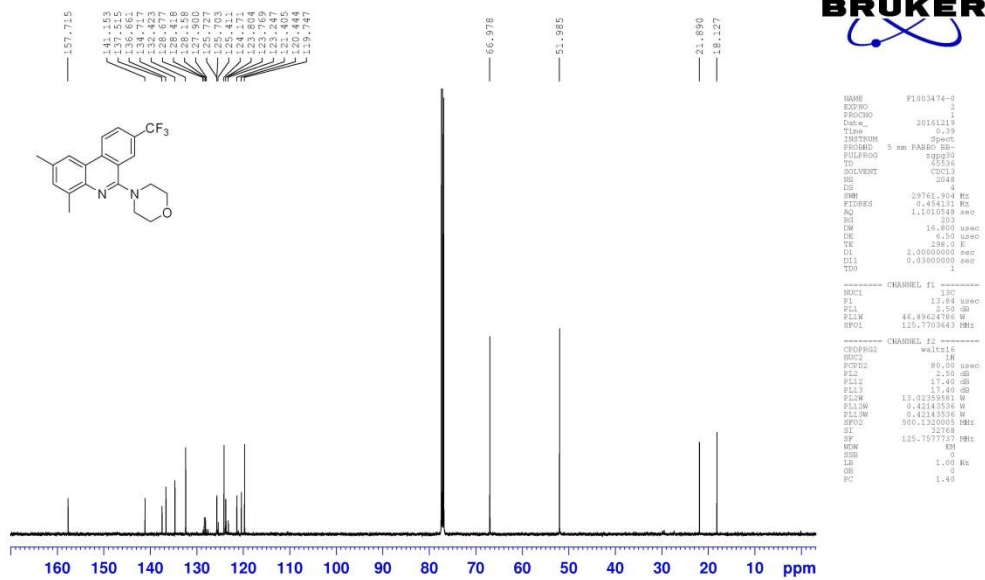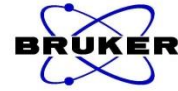

```

NAME      F1003474-3
EXPNO    1
PROCNO   1
Date_    20161219
Time     0.39
INSTRUM  spect
PROBHD   5 mm PABBO QNP-
PULPROG  zgpg30
TD        65536
SOLVENT  CDCl3
NS        16
DS        4
SWH      29761.908 Hz
FIDRES   0.454131 Hz
AQ        1.1010518 sec
RG        203
DE        16.800 usec
CF        6.50 usec
CR        296.0 F
DL        2.00000000 sec
DQ        0.03000000 sec
VDD
  
```

```

----- CHANNEL f1 -----
NUC1      13C
P1        13.84 usec
PL        2.50 dB
PL1W     46.49624796 W
SFO1     125.7703643 MHz

----- CHANNEL f2 -----
P2        80.00 usec
PL2       1.50 dB
PL12     11.40 dB
PL12W    13.40 dB
PL12W    0.42143536 W
SFO2     900.1320003 MHz
SI        21296
SF        125.7577127 MHz
WDW       EM
SSB       0
LB        1.00 Hz
GB        0
PC        1.40
  
```

3e

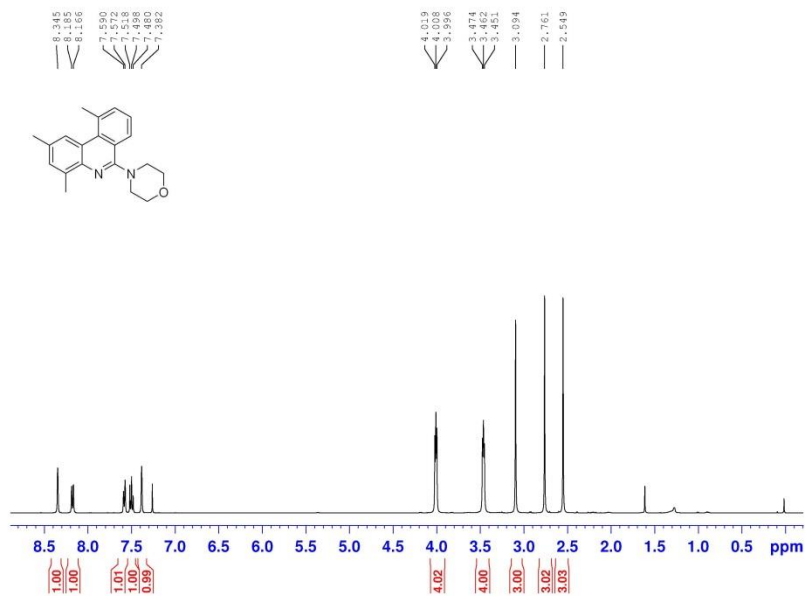

```

NAME      F1003463-2
EXPNO    1
PROCNO   1
Date_    20161110
Time     17.16
INSTRUM  spect
PROBHD   5 mm DOL-13C-1
PULPROG  zgpg30
TD        65536
SOLVENT  CDCl3
NS        16
DS        4
SWH       6279.146 Hz
FIDRES   0.1232114 Hz
AQ        3.9584243 sec
RG         114
DE        1.14
CE        60.400 usec
CF        6.50 usec
CR        295.4 K
DL        1.00000000 sec
TD0       1
----- CHANNEL f1 -----
NUC1      13C
P1         12.58 usec
PL1        0.00 dB
PL12       19.87646866 W
SFO1       400.1254116 MHz
SI         32768
SF         400.1320000 MHz
WDW        EM
SSB        0
LB         0.30 Hz
GB         0
PC         1.00
  
```

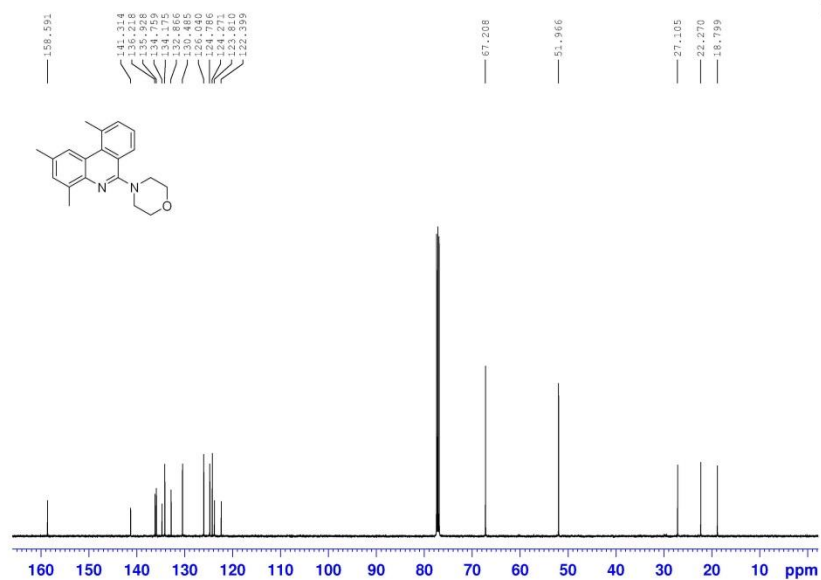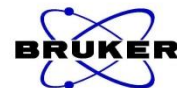

```

NAME      F1003463-3
EXPNO    1
PROCNO   1
Date_    20161111
Time     9.31
INSTRUM  spect
PROBHD   5 mm PABBO BB-
PULPROG  zgpg30
TD        65536
SOLVENT  CDCl3
NS        16
DS        4
SWH       29761.908 Hz
FIDRES   0.454131 Hz
AQ        1.1011018 sec
RG         203
DE        16.800 usec
CF        6.50 usec
CR        295.4 K
DL        2.00000000 sec
TD0       0.03000000 sec
----- CHANNEL f1 -----
NUC1      13C
P1         13.84 usec
PL1        2.50 dB
PL12       46.89624796 W
SFO1       125.7703643 MHz
----- CHANNEL f2 -----
CPDPRG2  waltz16
NUC2      1H
PCPD2    80.00 usec
PL2       1.50 dB
PL12     11.40 dB
PL13     11.40 dB
PL14     11.40 dB
PL15     11.40 dB
PL16     11.40 dB
PL17     11.40 dB
PL18     11.40 dB
PL19     11.40 dB
PL20     11.40 dB
PL21     11.40 dB
PL22     11.40 dB
PL23     11.40 dB
PL24     11.40 dB
PL25     11.40 dB
PL26     11.40 dB
PL27     11.40 dB
PL28     11.40 dB
PL29     11.40 dB
PL30     11.40 dB
PL31     11.40 dB
PL32     11.40 dB
PL33     11.40 dB
PL34     11.40 dB
PL35     11.40 dB
PL36     11.40 dB
PL37     11.40 dB
PL38     11.40 dB
PL39     11.40 dB
PL40     11.40 dB
PL41     11.40 dB
PL42     11.40 dB
PL43     11.40 dB
PL44     11.40 dB
PL45     11.40 dB
PL46     11.40 dB
PL47     11.40 dB
PL48     11.40 dB
PL49     11.40 dB
PL50     11.40 dB
PL51     11.40 dB
PL52     11.40 dB
PL53     11.40 dB
PL54     11.40 dB
PL55     11.40 dB
PL56     11.40 dB
PL57     11.40 dB
PL58     11.40 dB
PL59     11.40 dB
PL60     11.40 dB
PL61     11.40 dB
PL62     11.40 dB
PL63     11.40 dB
PL64     11.40 dB
PL65     11.40 dB
PL66     11.40 dB
PL67     11.40 dB
PL68     11.40 dB
PL69     11.40 dB
PL70     11.40 dB
PL71     11.40 dB
PL72     11.40 dB
PL73     11.40 dB
PL74     11.40 dB
PL75     11.40 dB
PL76     11.40 dB
PL77     11.40 dB
PL78     11.40 dB
PL79     11.40 dB
PL80     11.40 dB
PL81     11.40 dB
PL82     11.40 dB
PL83     11.40 dB
PL84     11.40 dB
PL85     11.40 dB
PL86     11.40 dB
PL87     11.40 dB
PL88     11.40 dB
PL89     11.40 dB
PL90     11.40 dB
PL91     11.40 dB
PL92     11.40 dB
PL93     11.40 dB
PL94     11.40 dB
PL95     11.40 dB
PL96     11.40 dB
PL97     11.40 dB
PL98     11.40 dB
PL99     11.40 dB
PL100    11.40 dB
  
```

3f

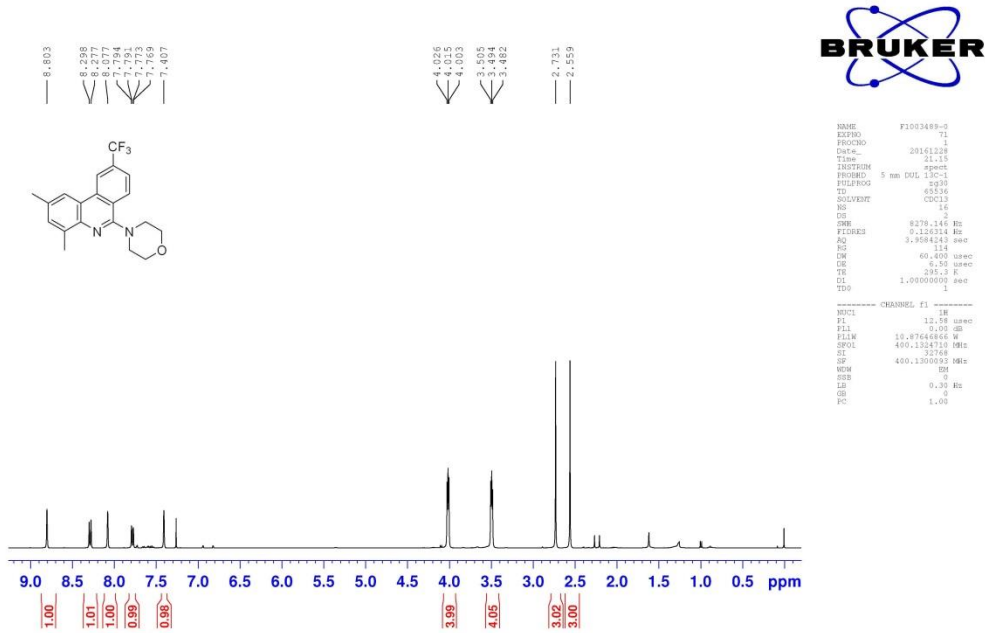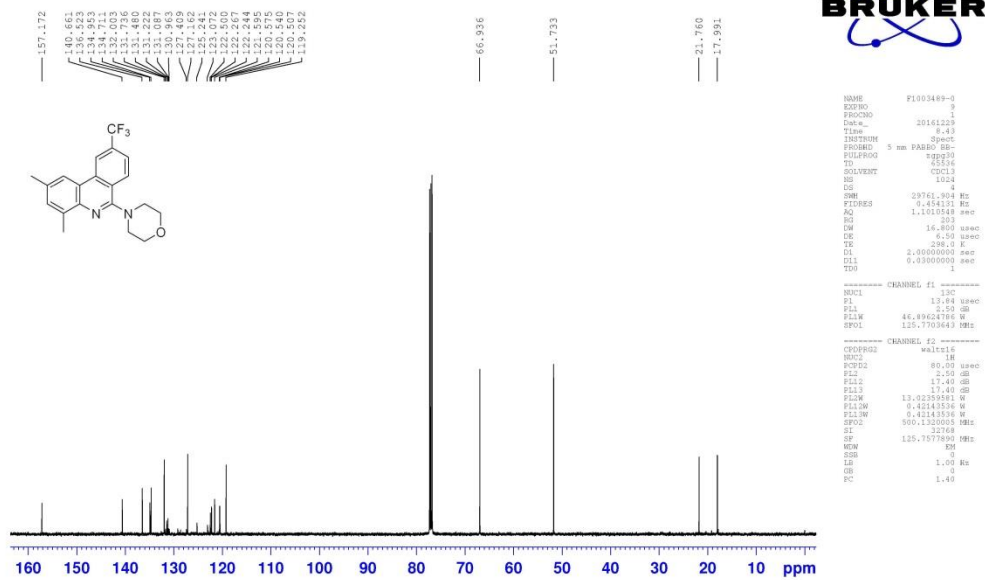

3g

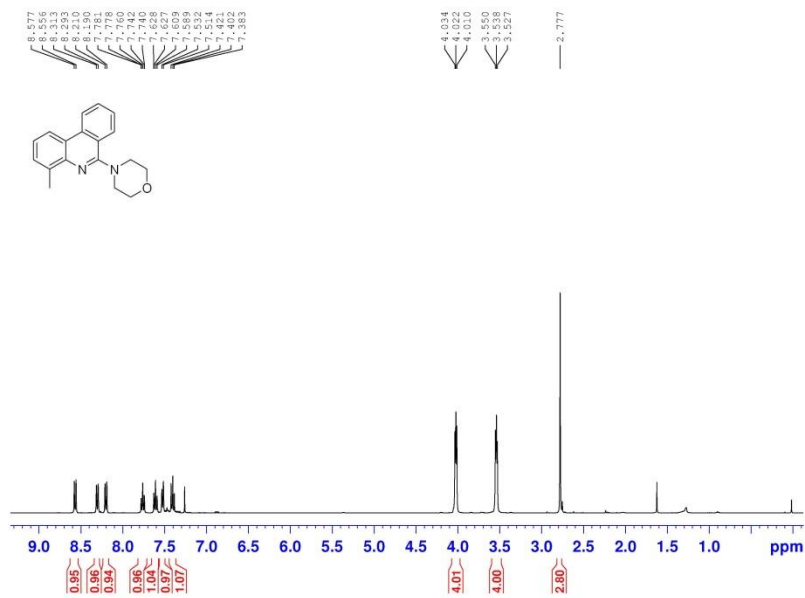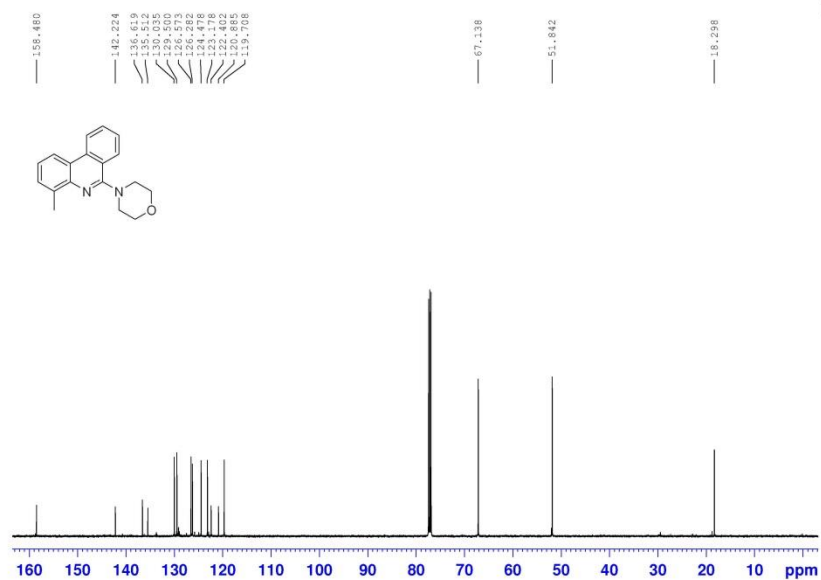



3h

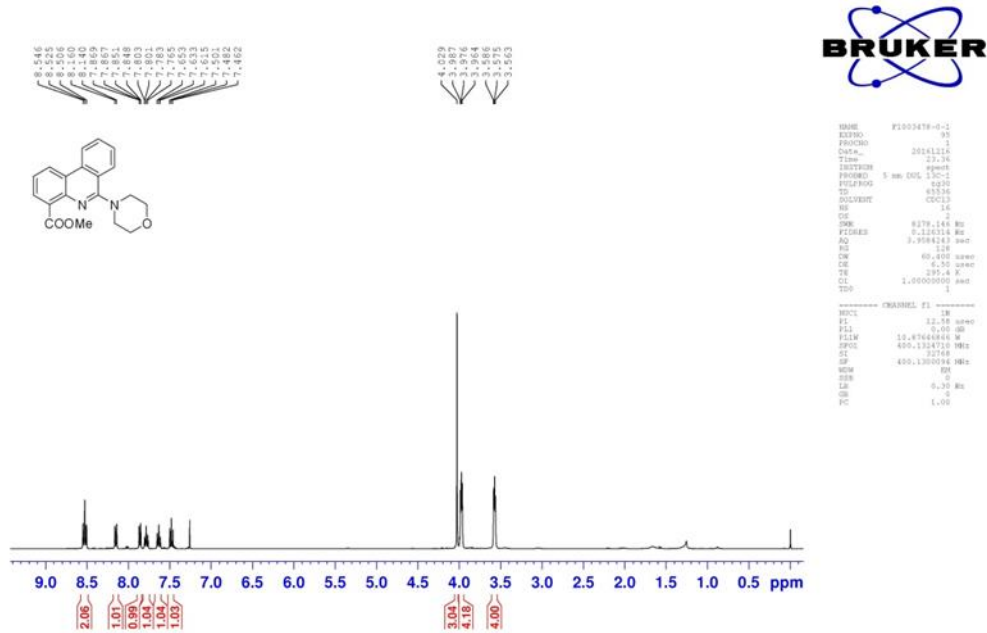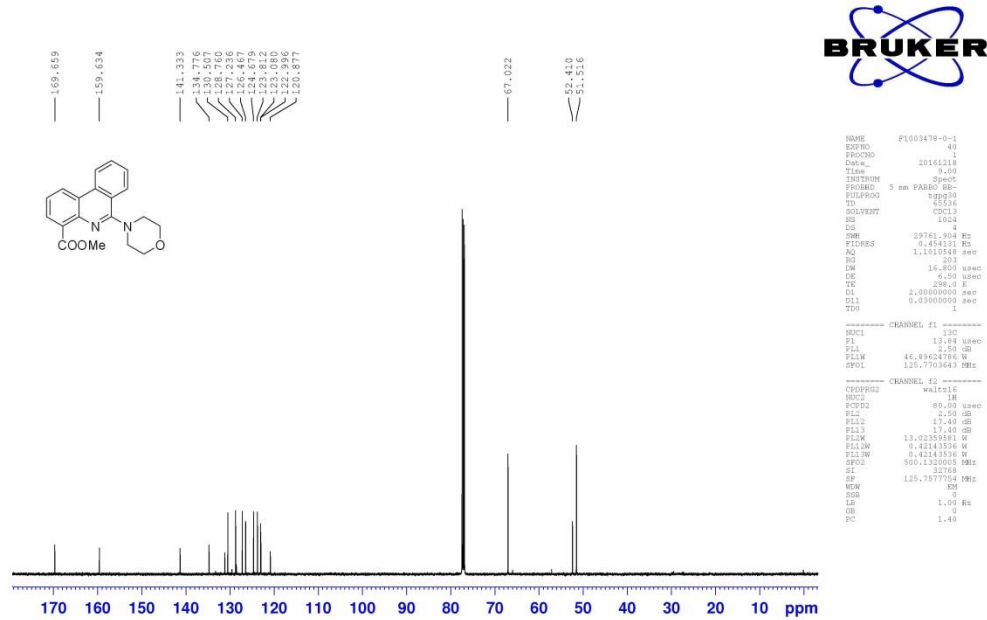

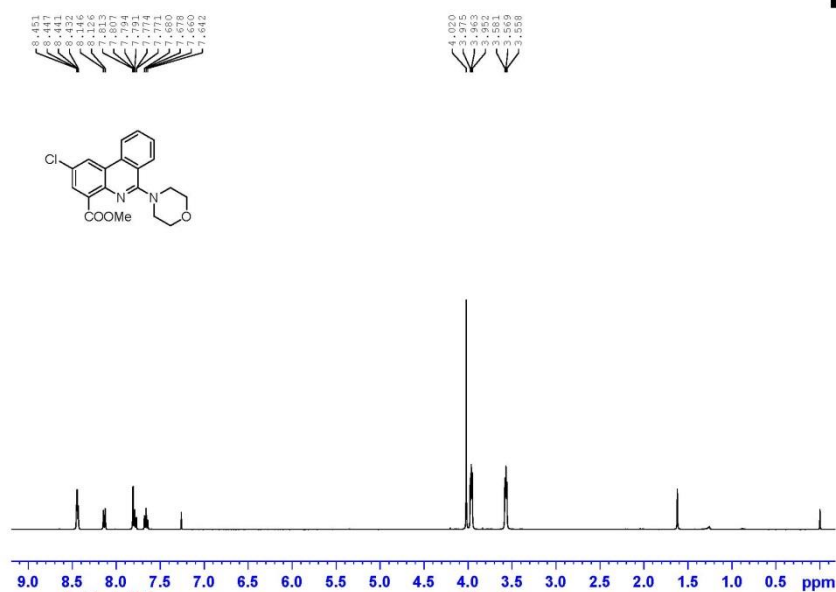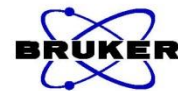

```

NAME      01450175-0-2
EXPNO    18
PROCNO   1
Date_    20160904
Time     23.43
INSTRUM spect
PROBHD   5 mm DUL 13C-1
PULPROG zgpg30
TD        65536
SOLVENT  CDCl3
NS        2048
DS        4
SFO1     29761.994 Hz
FIDRES   0.454131 Hz
AQ        1.1010518 sec
RG        203
SF        16.800 MHz
DE        6.50 usec
TE        303.2 K
DL        2.00000000 sec
TDO       0.03000001 sec
TDD       1
  
```

```

----- CHANNEL f1 -----
NUC1      1H
P1        12.50 usec
PL1       0.00 dB
PL12      10.8764686 dB
SFO1      400.1324710 MHz
SI        32768
SF        400.1300093 MHz
MW        0
SFB       0
LB        0.30 Hz
GB        0
PC        1.00
  
```

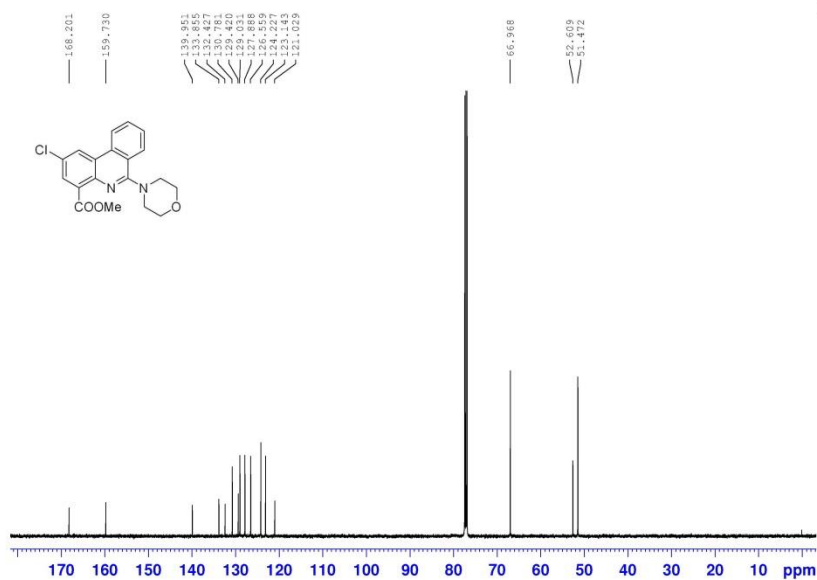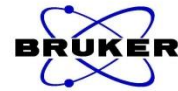

```

NAME      01450175-0-3
EXPNO    5
PROCNO   1
Date_    20160904
Time     1.36
INSTRUM spect
PROBHD   5 mm PABBO BB-
PULPROG zgpg30
TD        65536
SOLVENT  CDCl3
NS        2048
DS        4
SFO1     29761.994 Hz
FIDRES   0.454131 Hz
AQ        1.1010518 sec
RG        203
SF        16.800 MHz
DE        6.50 usec
TE        303.2 K
DL        2.00000000 sec
TDO       0.03000001 sec
TDD       1
  
```

```

----- CHANNEL f1 -----
NUC1      13C
P1        13.84 usec
PL1       2.50 dB
PL12      46.49624796 dB
SFO1      125.7703643 MHz

----- CHANNEL f2 -----
CPDPRG2  waltz16
NUC2      13C
P2        80.00 usec
PL2       1.50 dB
PL12      11.40 dB
PL13      11.40 dB
PL14      11.40 dB
PL15      11.40 dB
PL16      13.02355885 dB
PL17      0.42143536 W
PL18      0.42143536 W
SFO2      900.1320003 MHz
SI        32768
SF        125.7677121 MHz
MW        0
SFB       1.00 Hz
LB        0
GB        0
PC        1.40
  
```

3j

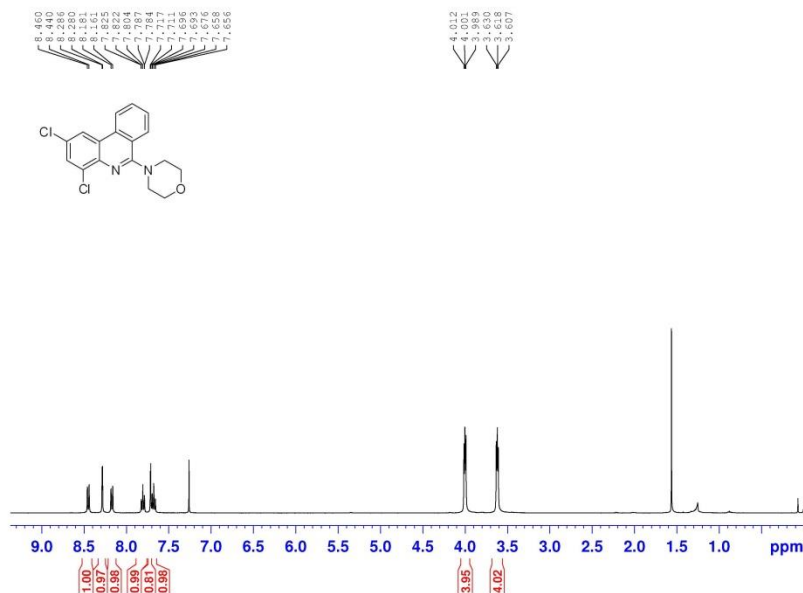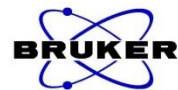

```

NAME      01450174-0
EXPNO    1
PROCNO   1
Date_    20160822
Time     1.00
INSTRUM  spect
PROBHD   5 mm DOL-13C-1
PULPROG  zgpg30
TD        65536
SOLVENT  CDCl3
NS        32768
DS        4
SWH       6279.146 Hz
FIDRES   0.232259 Hz
AQ        1.9792372 sec
RG         362
DM         60.400 usec
DE         6.50 usec
TE        300.2 K
D1        1.0000000 sec
TD0       1
  
```

----- CHANNEL f1 -----

```

NUC1      13C
P1         12.58 usec
PL1        0.00 dB
PL12       19.8764686 dB
SFO1      400.1324100 MHz
SI         15384
SF         400.1320000 MHz
WDW        EM
SSB         0
LB         0.30 Hz
GB         0
PC         1.00
  
```

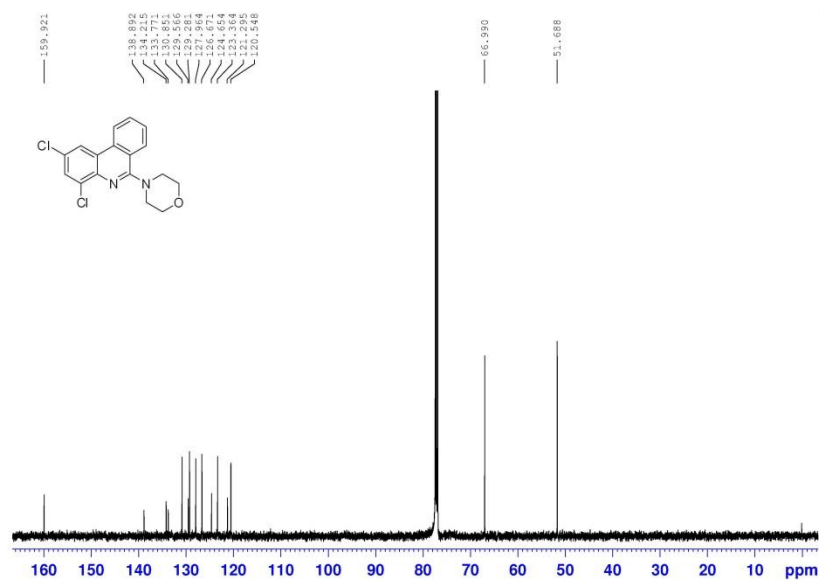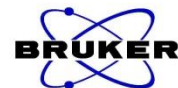

```

NAME      01450174-0
EXPNO    13
PROCNO   1
Date_    20160824
Time     3.58
INSTRUM  spect
PROBHD   5 mm PABBO QNP
PULPROG  zgpg30
TD        65536
SOLVENT  CDCl3
NS        20224
DS        4
SWH       29761.908 Hz
FIDRES   0.454131 Hz
AQ        1.1010518 sec
RG         203
DM         16.800 usec
DE         6.50 usec
TE        300.2 K
D1        2.0000000 sec
D11       0.0300000 sec
TD0       1
  
```

----- CHANNEL f1 -----

```

NUC1      13C
P1         13.84 usec
PL1        2.25 dB
PL12       46.49624796 dB
SFO1      125.7703647 MHz
  
```

----- CHANNEL f2 -----

```

CPDPRG2  waltz16
NUC2      1H
PCPD2    80.00 usec
PL2       1.50 dB
PL12     11.40 dB
PL13     11.40 dB
PL14     11.40 dB
PL15     11.40 dB
PL16     13.02355888 dB
PL17     0.42143536 dB
PL18     0.42143536 dB
SFO2     500.1320000 MHz
SI         21
SF        125.7577703 MHz
WDW        EM
SSB         0
LB         1.00 Hz
GB         0
PC         1.40
  
```

3k

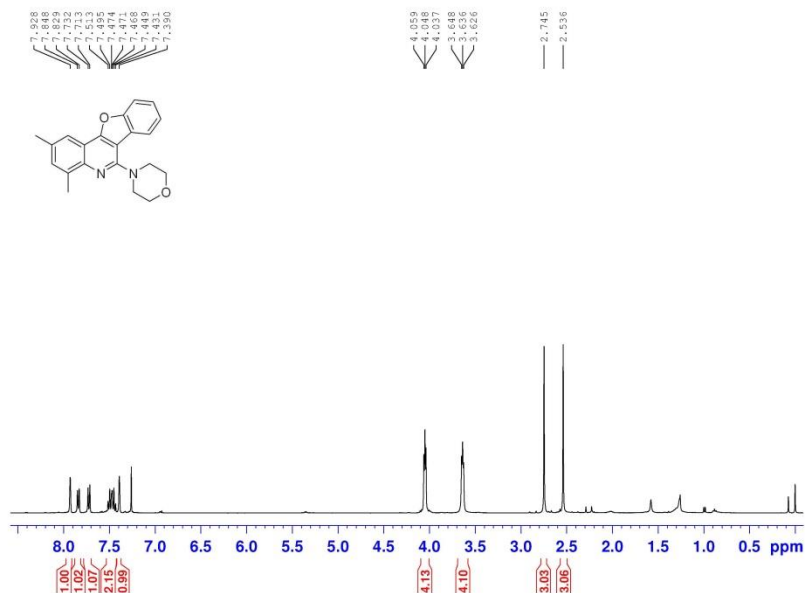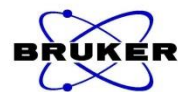

```

NAME      F1003490-2
EXPNO    1
PROCNO   1
Date_    20161127
Time     17.58
INSTRUM  spect
PROBHD   5 mm DOL-13C-1
PULPROG  zgpg30
TD        65536
SOLVENT  CDCl3
NS        16
DS        4
SWH       6279.146 Hz
FIDRES   0.123214 Hz
AQ        3.9584243 sec
RG        326
OR        60.400 usec
DE        6.50 usec
TE        295.7 K
DL        1.00000000 sec
TD0       1
  
```

----- CHANNEL f1 -----

```

NUC1      13C
P1        12.58 usec
PL1       0.00 dB
PL12      19.87644866 W
SFO1      400.1320000 MHz
SI        32768
SF        400.1320000 MHz
WDW       EM
SSB       0
LB        0.30 Hz
GB        0
PC        1.00
  
```

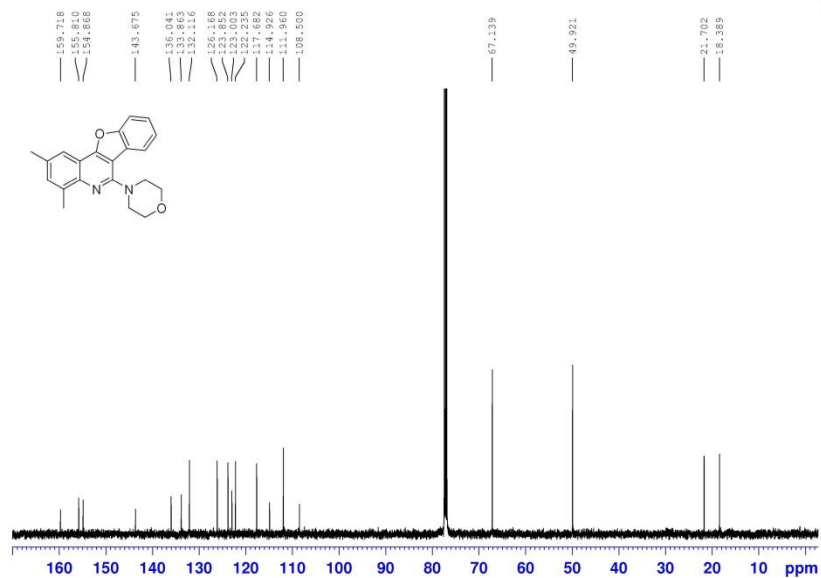

```

NAME      F1003490-3
EXPNO    19
PROCNO   1
Date_    20161128
Time     13.13
INSTRUM  spect
PROBHD   5 mm PABBO QNP
PULPROG  zgpg30
TD        65536
SOLVENT  CDCl3
NS        16
DS        4
SWH       29761.908 Hz
FIDRES   0.454131 Hz
AQ        1.1011048 sec
RG        203
OR        16.800 usec
DE        6.50 usec
TE        295.7 K
DL        2.00000000 sec
TD0       0.03000000 sec
  
```

----- CHANNEL f1 -----

```

NUC1      13C
P1        13.84 usec
PL1       2.50 dB
PL12      46.49624796 W
SFO1      125.7703643 MHz
  
```

----- CHANNEL f2 -----

```

CPDPRG2  waltz16
NUC2      1H
PCPD2    80.00 usec
PL2       1.50 dB
PL12     11.40 dB
PL13     11.40 dB
PL14     11.40 dB
PL15     13.02355888 W
PL16     0.42143536 W
PL17     0.42143536 W
SFO2     500.1320000 MHz
SI        65536
SF        125.7577123 MHz
WDW       EM
SSB       0
LB        1.00 Hz
GB        0
PC        1.40
  
```

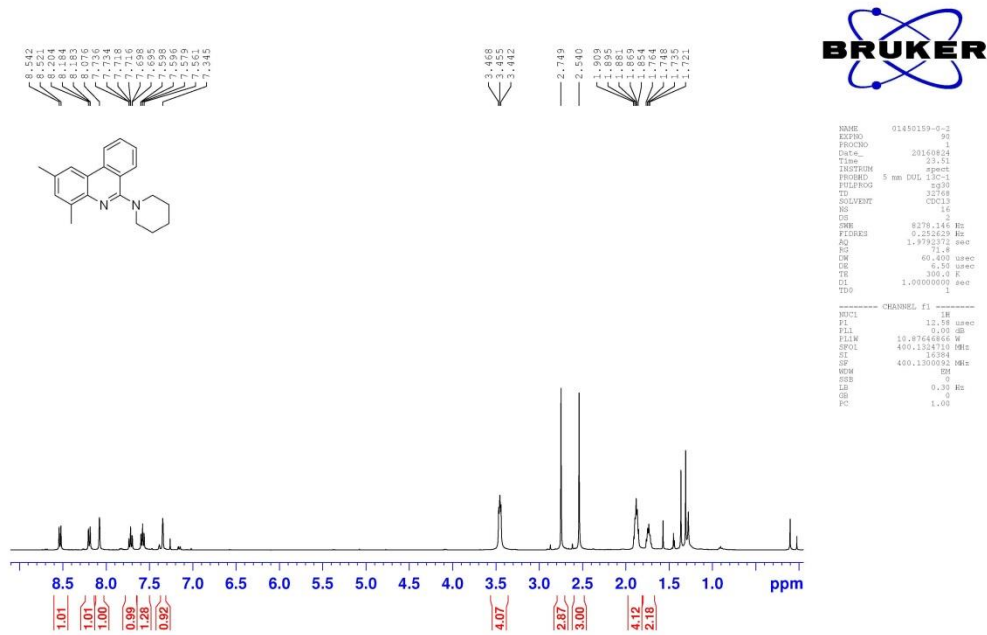

```

NAME      01450159-0-2
EXPNO    1
PROCNO   1
Date_    20160824
Time     23.51
INSTRUM  spect
PROBHD   5 mm DOL-13C-1
PULPROG  zgpg30
TD        65536
SOLVENT  CDCl3
NS        16
DS        4
SWH       6278.146 Hz
FIDRES   0.2322539 Hz
AQ        1.9792372 sec
RG         71.4
DE        0.100 E
CE        60.400 usec
CF        6.50 usec
CR        300.0 E
CQ        1.0000000 sec
CY        1
CZ        1
----- CHANNEL f1 -----
NUC1      13C
P1         12.58 usec
PL         0.00 dB
PL1W      19.87644866 W
SFO1      400.1324100 MHz
SI         15384
SF         400.1320000 MHz
WDW        EM
SSB         0
LB         0.30 Hz
GB         0
PC         1.00
  
```

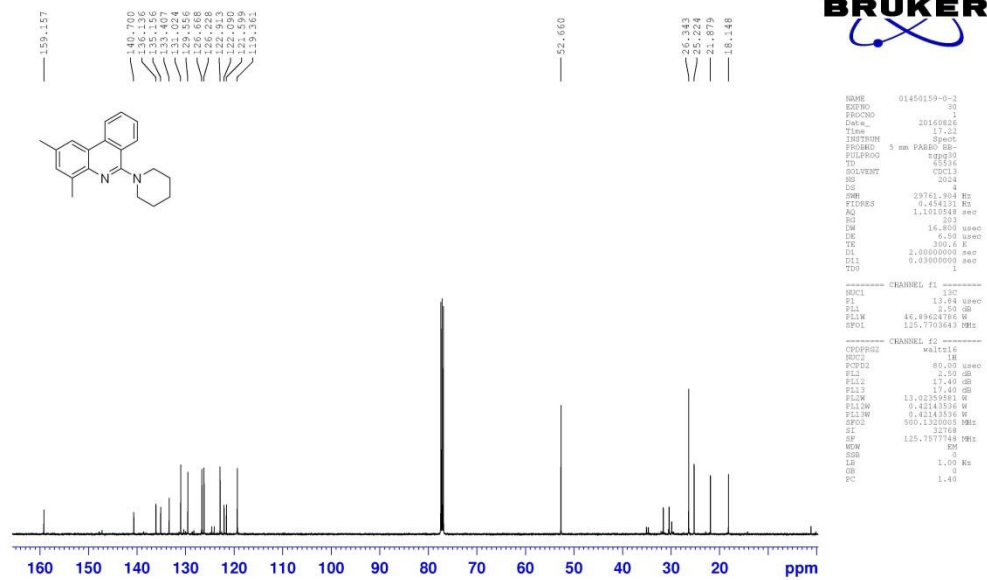

```

NAME      01450159-0-3
EXPNO    30
PROCNO   1
Date_    20160826
Time     17.21
INSTRUM  spect
PROBHD   5 mm PABBO QNP
PULPROG  zgpg30
TD        65536
SOLVENT  CDCl3
NS        2024
DS        4
SWH       23761.908 Hz
FIDRES   0.4541331 Hz
AQ        1.1010518 sec
RG         203
DE        0.100 E
CE        16.800 usec
CF        6.50 usec
CR        300.0 E
CQ        2.0000000 sec
CY        0.0300000 sec
CZ        1
----- CHANNEL f1 -----
NUC1      13C
P1         13.84 usec
PL         2.50 dB
PL1W      46.49624796 W
SFO1      125.7703643 MHz
----- CHANNEL f2 -----
CPDPRG2  waltz16
NUC2      1H
P2         80.00 usec
PL2         1.50 dB
PL12       11.40 dB
PL13       11.40 dB
PL14       11.40 dB
PL1W      13.02355888 W
SFO2      0.42143536 MHz
SFO3      0.42143536 MHz
SFO4      900.1320000 MHz
SI         31
SF         125.7677148 MHz
WDW        EM
SSB         0
LB         1.00 Hz
GB         0
PC         1.40
  
```

3m

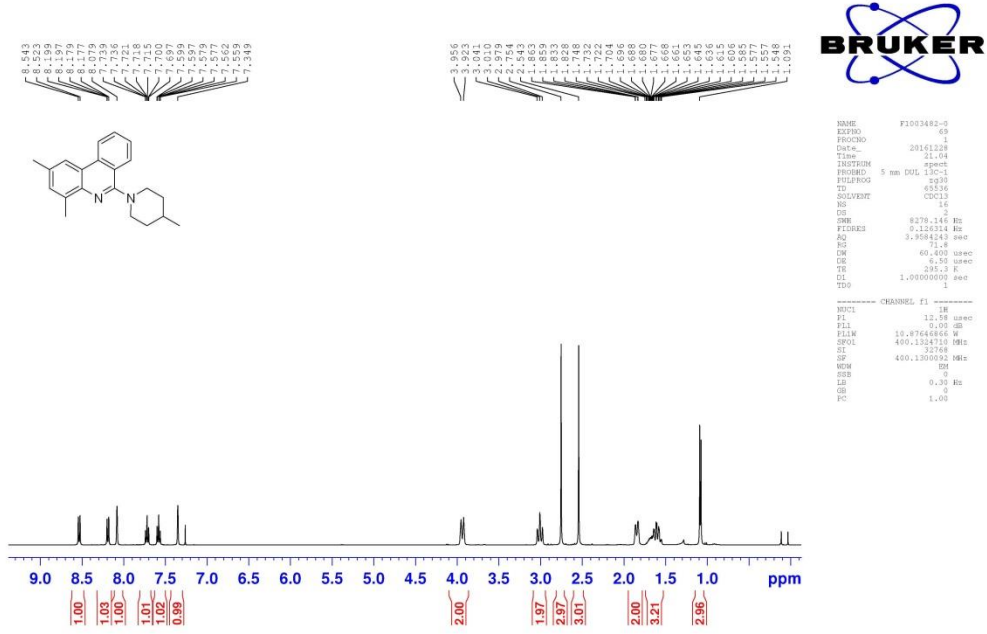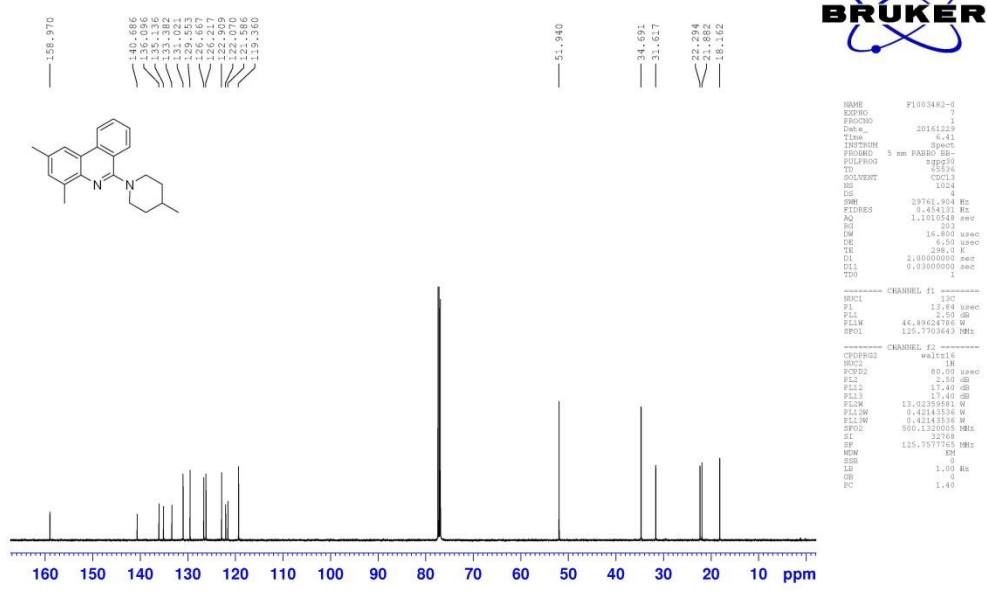

3n

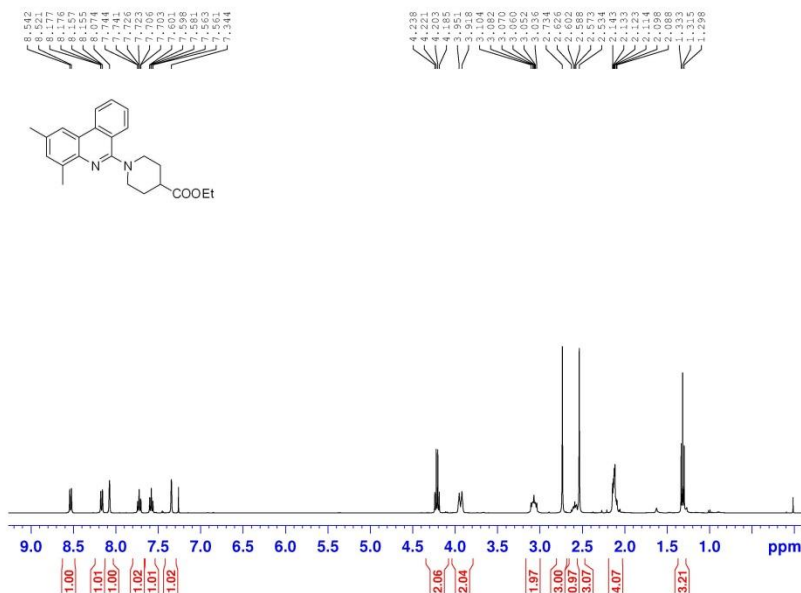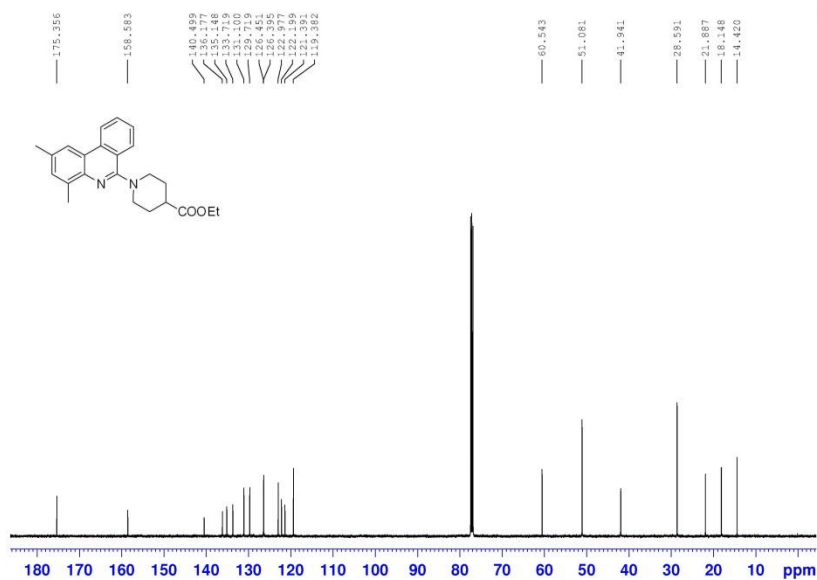

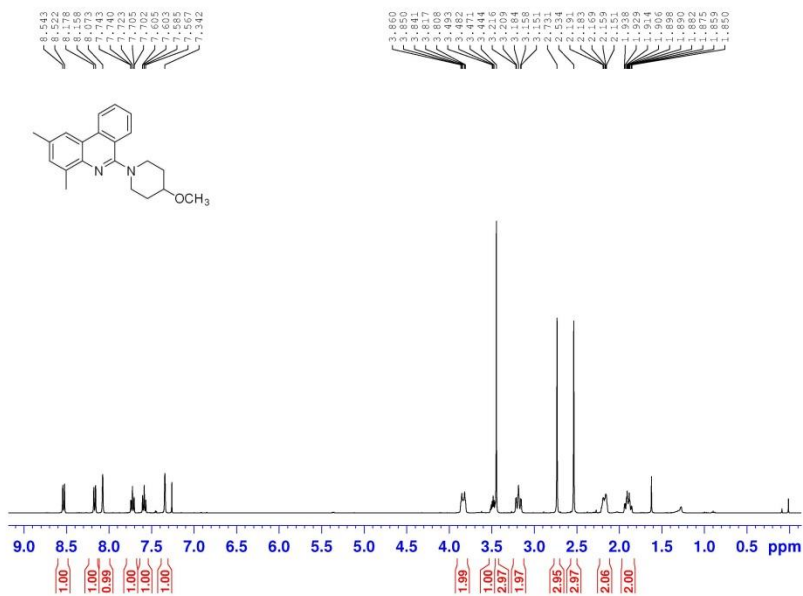

```

NAME      F1003484-0
EXPNO    1
PROCNO   1
Date_    20161227
Time     0.52
INSTRUM  spect
PROBHD   5 mm DOL-13C-1
PULPROG  zgpg30
TD        65536
SOLVENT  CDCl3
NS        16
DS        4
SWH       6279.146 Hz
FIDRES   0.120214 Hz
AQ        3.9584243 sec
RG         65.5
DE        60.400 usec
TE        6.50 usec
GB         294.0 K
DL         1.00000000 sec
WDW       1
SSB       0
----- CHANNEL f1 -----
NUC1      13C
P1         12.00 usec
PL1        0.00 dB
PL12       12.00 usec
PL122      0.00 dB
PL123     19.87644866 W
SFO1      400.1320003 MHz
SI         32768
SF         400.1320003 MHz
WDW        EM
SSB         0
LB         0.30 Hz
GB          0
PC         1.00
    
```

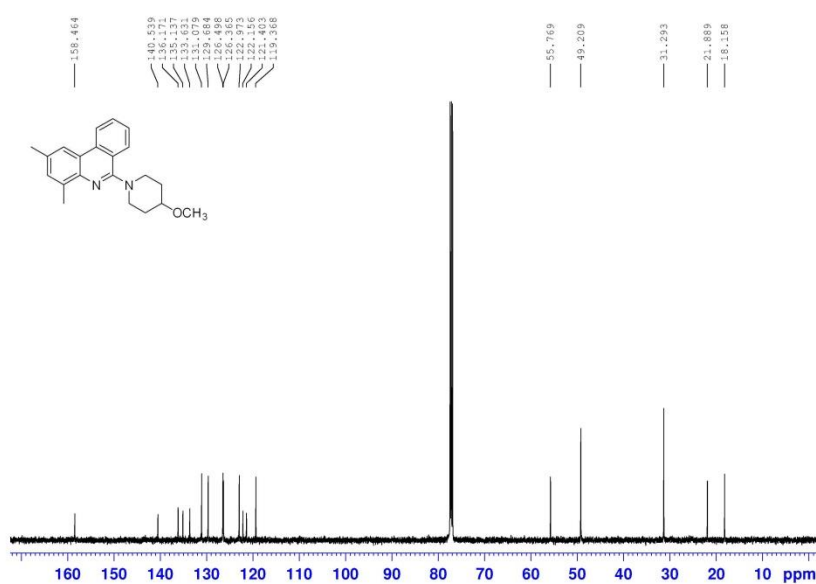

```

NAME      F1003484-0
EXPNO    109
PROCNO   1
Date_    20161227
Time     19.50
INSTRUM  spect
PROBHD   5 mm PABBO BB
PULPROG  zgpg30
TD        65536
SOLVENT  CDCl3
NS        16
DS        4
SWH       29761.908 Hz
FIDRES   0.454131 Hz
AQ        1.1010168 sec
RG         203
DE        16.800 usec
TE        6.50 usec
GB         294.0 K
DL         2.00000000 sec
WDW       0
SSB         0
----- CHANNEL f1 -----
NUC1      13C
P1         13.84 usec
PL1        0.00 dB
PL12       46.49624796 W
SFO1      125.7703649 MHz
----- CHANNEL f2 -----
CPDPRG2  waltz16
NUC2      1H
P2         80.00 usec
PL2        1.50 dB
PL12       11.40 dB
PL122     11.40 dB
PL123     13.02358888 W
SFO2      400.1413536 MHz
SFO12     400.1413536 MHz
SFO122    900.1320003 MHz
SI         32768
SF         125.7677113 MHz
WDW        EM
SSB         0
LB         1.00 Hz
GB          0
PC         1.40
    
```



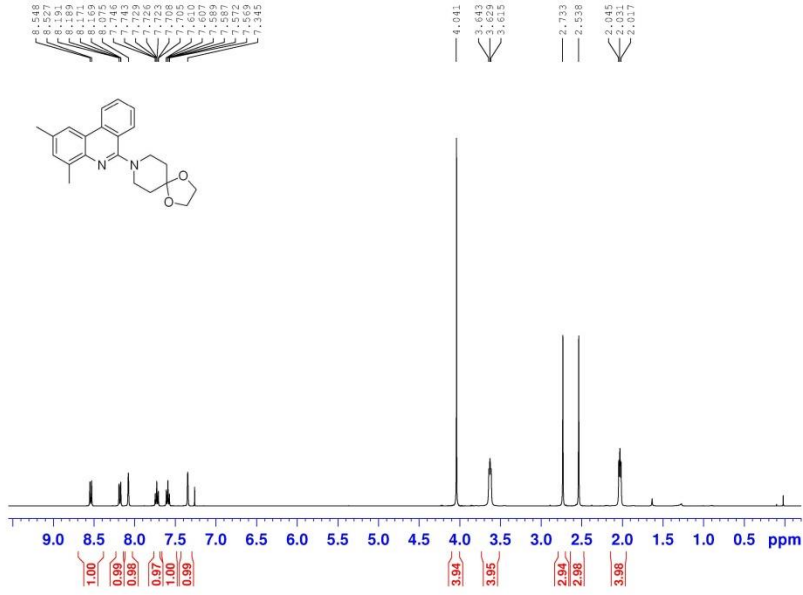

```

NAME      F1003486-9
EXPNO    1
PROCNO    1
Date_    20161127
Time     17.46
INSTRUM   spect
PROBHD    5 mm DOL-13C-1
PULPROG   zgpg30
TD        65536
SOLVENT   CDCl3
NS        16
DS        4
SWH       6278.146 Hz
FIDRES    0.121214 Hz
AQ        3.9584243 sec
RG        314
OR        60.400 usec
DE        6.50 usec
TE        295.6 K
DQ        1.0000000 sec
VDD       1

----- CHANNEL f1 -----
NUC1      13C
P1        12.58 usec
PL1       0.00 dB
PL12      19.8764686 W
SFO1      400.1320000 MHz
SI        32768
SF        400.1320000 MHz
WDW       EM
SSB       0
LB        0.30 Hz
GB        0
PC        1.00
    
```

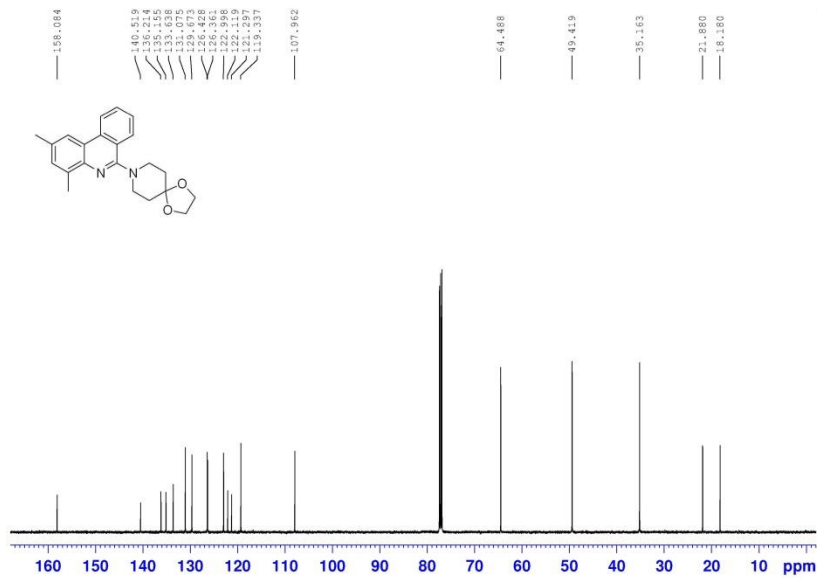

```

NAME      F1003486-3
EXPNO    17
PROCNO    1
Date_    20161128
Time     11.19
INSTRUM   spect
PROBHD    5 mm PABBO QNP
PULPROG   zgpg30
TD        65536
SOLVENT   CDCl3
NS        16
DS        4
SWH       23761.908 Hz
FIDRES    0.454131 Hz
AQ        1.1010518 sec
RG        203
OR        16.800 usec
DE        6.50 usec
TE        295.6 K
DQ        2.0000000 sec
VDD       0.03000000 sec

----- CHANNEL f1 -----
NUC1      13C
P1        13.84 usec
PL1       1.50 dB
PL12      46.49624796 W
SFO1      125.7703643 MHz

----- CHANNEL f2 -----
CPDPRG2   waltz16
NUC2      1H
PCPD2     80.00 usec
PL2       1.50 dB
PL12      11.40 dB
PL13      11.40 dB
PL14      11.40 dB
PL15      13.02358888 W
PL16      0.42143536 W
PL17      0.42143536 W
SFO2      500.1320000 MHz
SI        32768
SF        500.1320000 MHz
WDW       EM
SSB       0
LB        1.00 Hz
GB        0
PC        1.40
    
```

3q

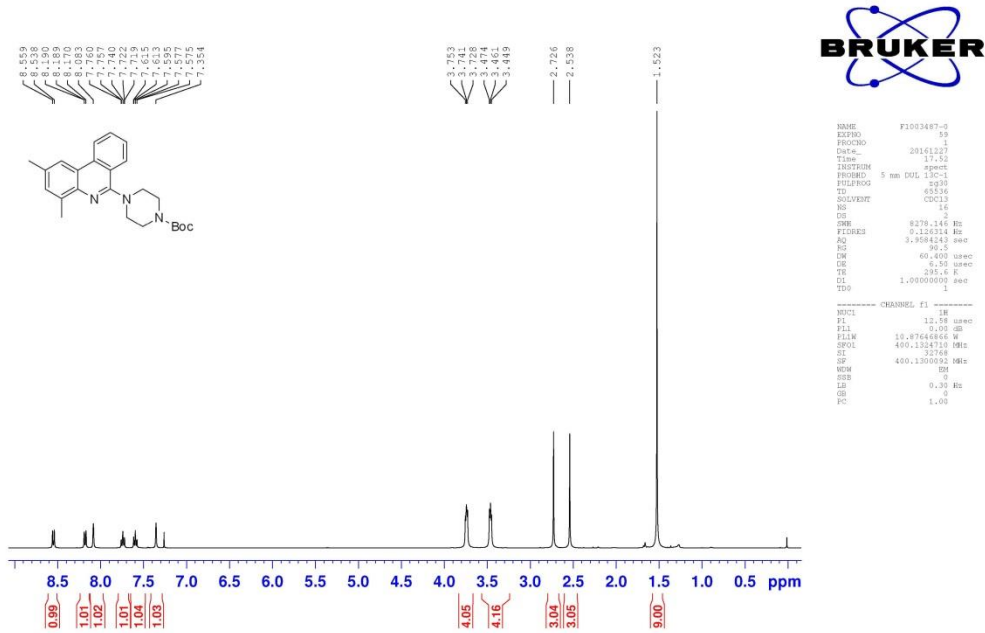

```

NAME      F1003487-5
EXPNO     1
PROCNO    1
Date_     20161227
Time      17.52
INSTRUM   spect
PROBHD    5 mm DOL 150-1
PULPROG   zgpg30
TD         65536
SOLVENT   CDCl3
NS         16
DS         4
SWH        8278.146 Hz
F2REFS    0.125214 Hz
AQ         3.9584243 sec
RG         80.5
DM         60.400 usec
DE         6.50 usec
TE         295.6 K
DQ1        1.0000000 sec
VDD        1

===== CHANNEL f1 =====
NUC1       1H
P1         12.58 usec
PL1        0.00 dB
P12        19.8764666 W
SFO1       400.1324100 MHz
SI         32768
SF         400.1300000 MHz
WDW        EM
SSB        0
LB         0.30 Hz
GB         0
PC         1.00
  
```

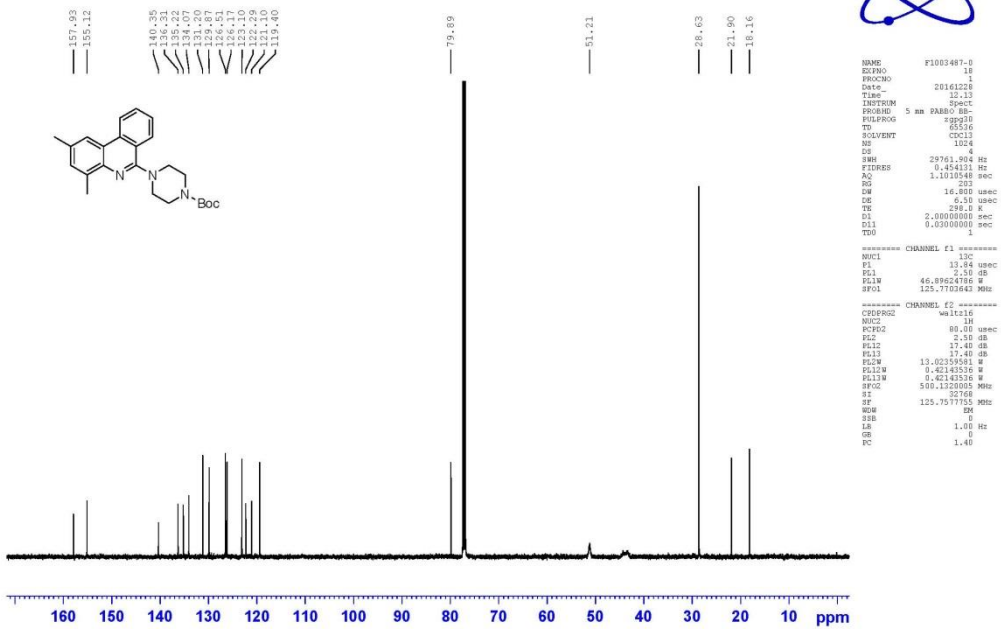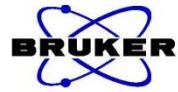

```

NAME      F1003487-5
EXPNO     1
PROCNO    1
Date_     20161228
Time      22.13
INSTRUM   spect
PROBHD    5 mm PABBO BB-
PULPROG   zgpg30
TD         65536
SOLVENT   CDCl3
NS         1024
DS         4
SWH        29761.904 Hz
F2REFS    0.454123 Hz
AQ         1.1010548 sec
RG         203
DM         16.900 usec
DE         6.50 usec
TE         298.0 K
DQ1        2.0000000 sec
DQ2        0.0300000 sec
VDD        1

===== CHANNEL f1 =====
NUC1       13C
P1         13.54 usec
PL1        2.50 dB
P12        46.8962496 W
SFO1       125.7703643 MHz

===== CHANNEL f2 =====
CPDPRG2   waltz16
NUC2       1H
PC1PC2    80.08 usec
P22        2.50 dB
PL12       17.40 dB
PL22       17.40 dB
PL13       13.0235950 W
P13W      0.42145356 sec
PL13W     0.42145356 sec
SFO2       500.1320000 MHz
SI         32768
SF         125.7577955 MHz
WDW        EM
SSB        0
LB         1.00 Hz
GB         0
PC         1.40
  
```

3r

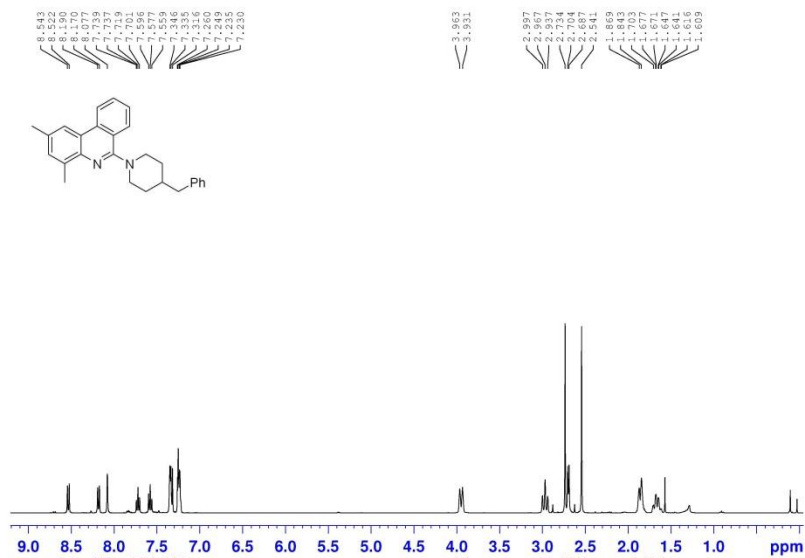

```

NAME      F1003488-3
EXPNO     1
PROCNO    1
Date_     20161227
Time      1.02
INSTRUM   spect
PROBHD    5 mm DOL 13C-1
PULPROG   zgpg30
TD         65536
SOLVENT   CDCl3
NS         16
DS         4
SWH        8278.146 Hz
FIDRES    0.1232314 Hz
AQ         3.9584243 sec
RG         80.0
DE         60.400 usec
QE         6.50 usec
OR         294.0 F
DL         1.00000000 sec
TD0        1
  
```

----- CHANNEL f1 -----

```

NUC1       13C
P1         12.08 usec
PL1        0.00 dB
PL12       19.87644866 W
SFO1       400.1320000 MHz
SI         32768
SF         400.1320000 MHz
WDW        EM
SSB        0
LB         0.30 Hz
GB         0
PC         1.00
  
```

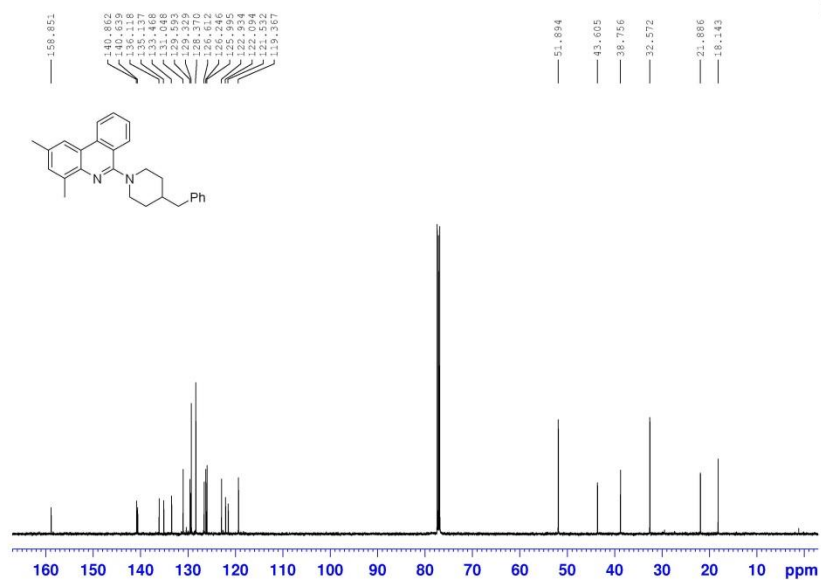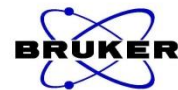

```

NAME      F1003488-3
EXPNO     4
PROCNO    1
Date_     20161227
Time      20.02
INSTRUM   spect
PROBHD    5 mm PABBO 13C
PULPROG   zgpg30
TD         65536
SOLVENT   CDCl3
NS         16
DS         4
SWH        29761.908 Hz
FIDRES    0.454131 Hz
AQ         1.1010518 sec
RG         203
DE         16.800 usec
QE         6.50 usec
OR         294.0 F
DL         2.00000000 sec
TD0        1
  
```

----- CHANNEL f1 -----

```

NUC1       13C
P1         13.84 usec
PL1        0.00 dB
PL12       46.49624796 W
SFO1       125.7703643 MHz
  
```

----- CHANNEL f2 -----

```

CPDPRG2   waltz16
NUC2       1H
PCPD2     80.00 usec
PL2        1.50 dB
PL12      11.40 dB
PL13      11.40 dB
PL14      11.40 dB
PL15      13.02355888 W
PL16      0.42143536 W
PL17      0.42143536 W
SFO2      500.1320000 MHz
SI         32768
SF         125.7677163 MHz
WDW        EM
SSB        0
LB         1.00 Hz
GB         0
PC         1.40
  
```

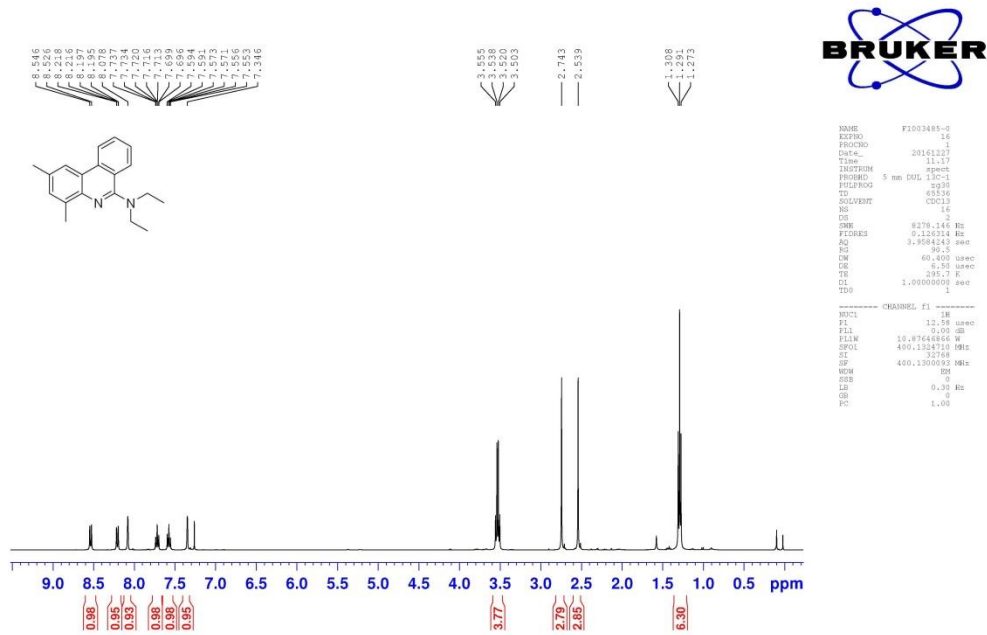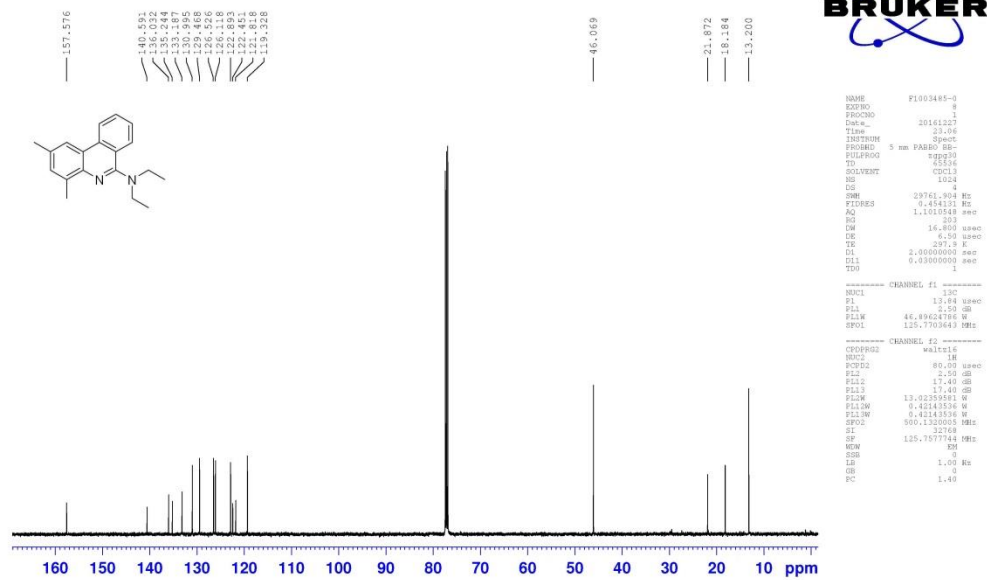

5a

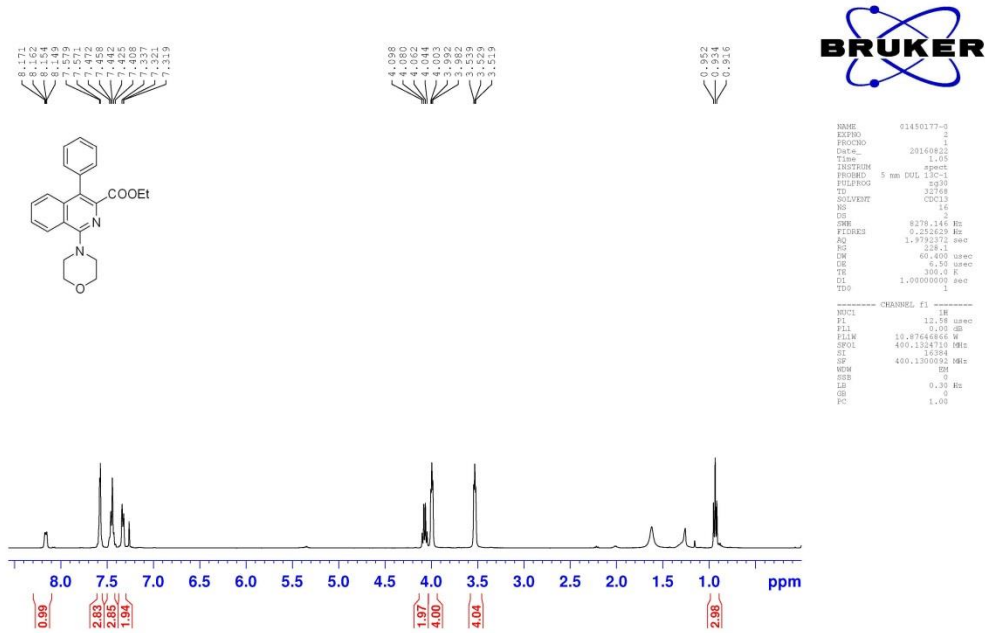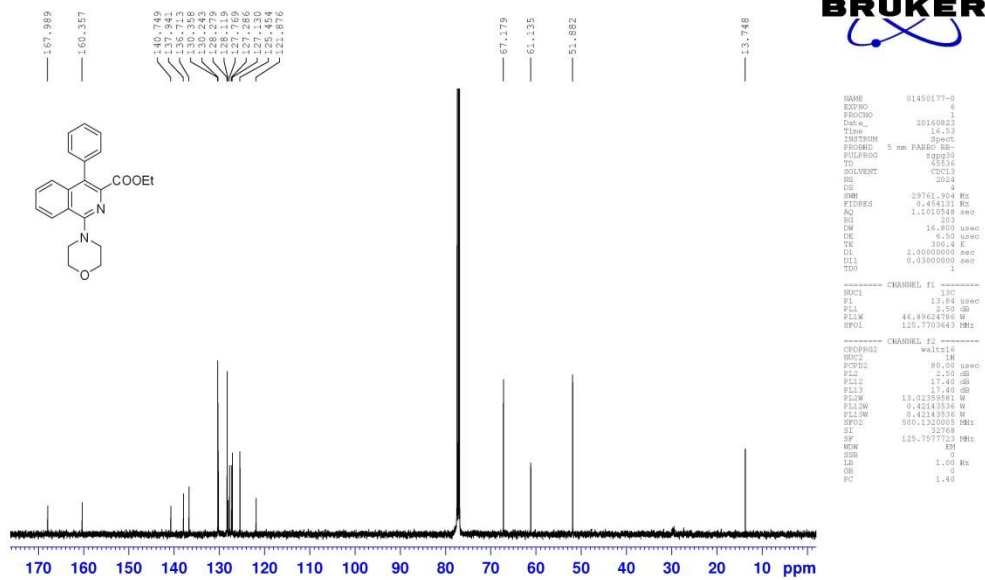

5b

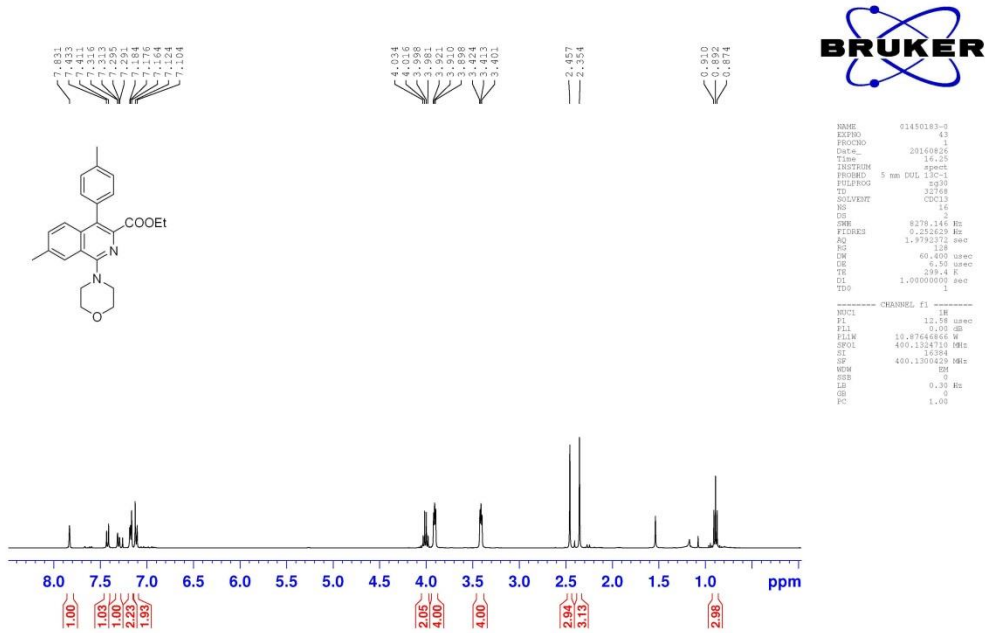

```

NAME      01450183-9
EXPNO    1
PROCNO   1
Date_    20160827
Time     16.25
INSTRUM  spect
PROBHD   5 mm DOL-13C-1
PULPROG  zgpg30
TD        65536
SOLVENT  CDCl3
NS        32768
DS        4
SWH       6279.146 Hz
FIDRES   0.232239 Hz
AQ        1.9792372 sec
RG        323
DE        1.00
CE        60.400 usec
CR        6.50 usec
GB        299.4 F
DL        1.00000000 sec
TO        1
----- CHANNEL f1 -----
NUC1      13C
P1        12.00 usec
PL1       0.00 dB
PL12      19.87644866 W
SFO1      400.1320000 MHz
SI        15384
SF        400.1320000 MHz
WDW       EM
SSB       0
LB        0.30 Hz
GB        0
PC        1.00
  
```

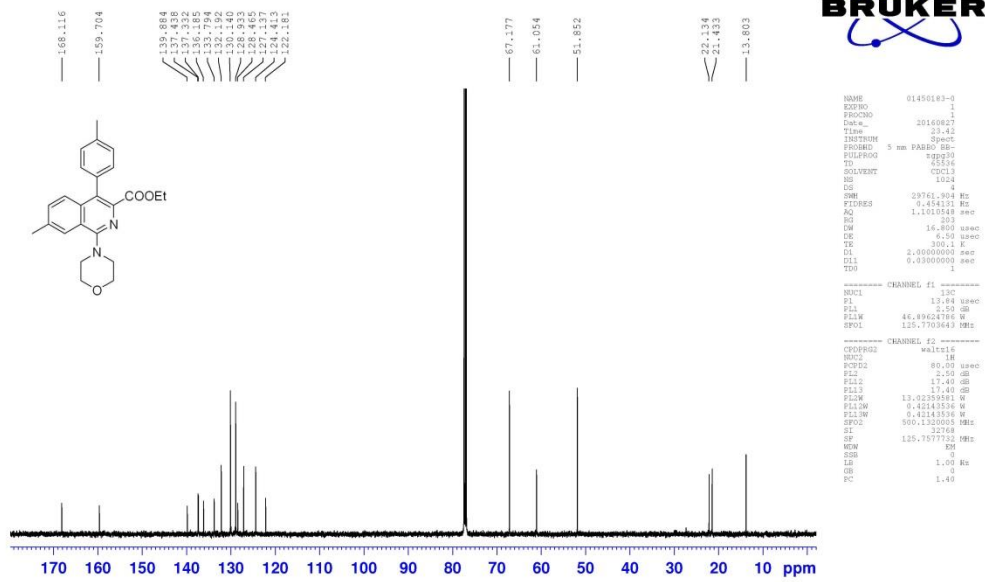

```

NAME      01450183-9
EXPNO    1
PROCNO   1
Date_    20160827
Time     21.42
INSTRUM  spect
PROBHD   5 mm PABBO DE
PULPROG  zgpg30
TD        65536
SOLVENT  CDCl3
NS        32768
DS        4
SWH       29761.908 Hz
FIDRES   0.454131 Hz
AQ        1.1010518 sec
RG        323
DE        16.800 usec
CR        6.50 usec
GB        299.4 F
DL        2.00000000 sec
TO        0.03000000 sec
----- CHANNEL f1 -----
NUC1      13C
P1        13.00 usec
PL1       0.00 dB
PL12      46.49624796 W
SFO1      125.7703643 MHz
----- CHANNEL f2 -----
CPDPRG2  waltz16
NUC2      1H
PCPD2    80.00 usec
PL2      1.50 dB
PL12     11.40 dB
PL13     11.40 dB
PL14     11.40 dB
PL15     11.40 dB
PL16     13.02355888 W
PL17     0.42143536 W
PL18     0.42143536 W
SFO2     500.1320000 MHz
SI        31
SF        125.7577122 MHz
WDW       EM
SSB       0
LB        1.00 Hz
GB        0
PC        1.40
  
```

5c

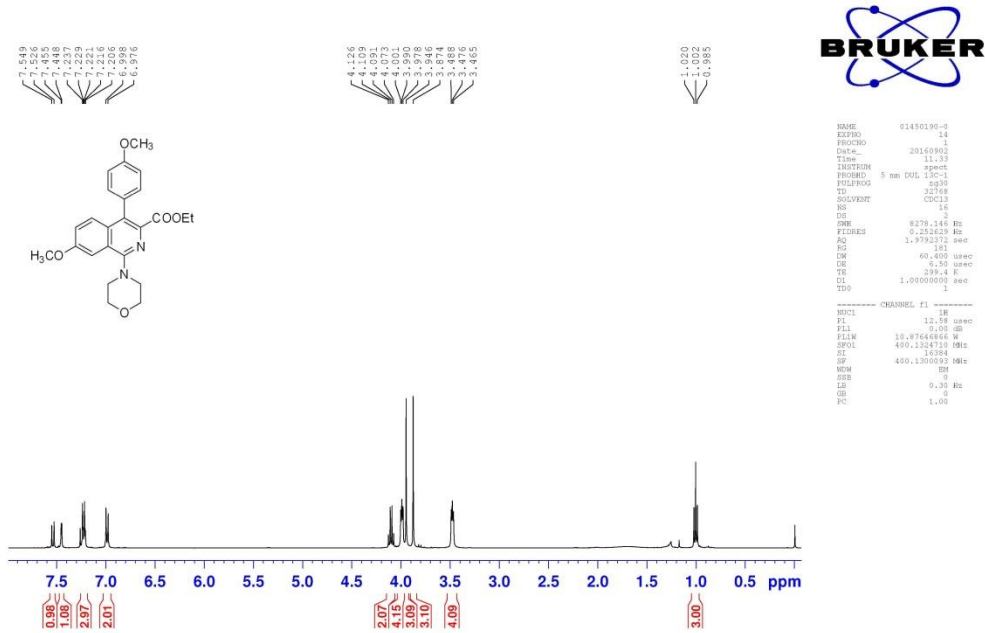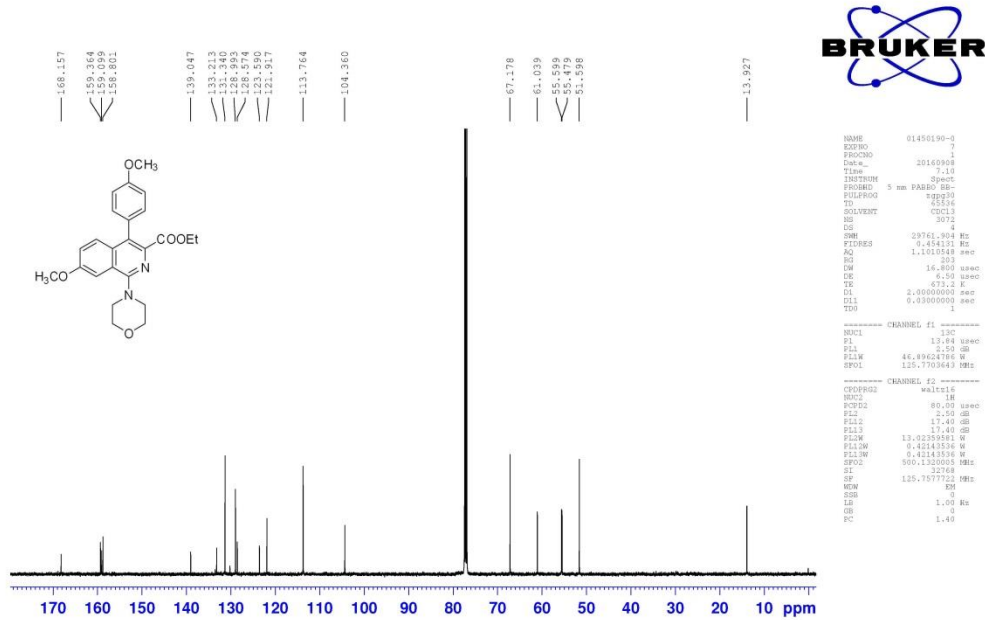

5d

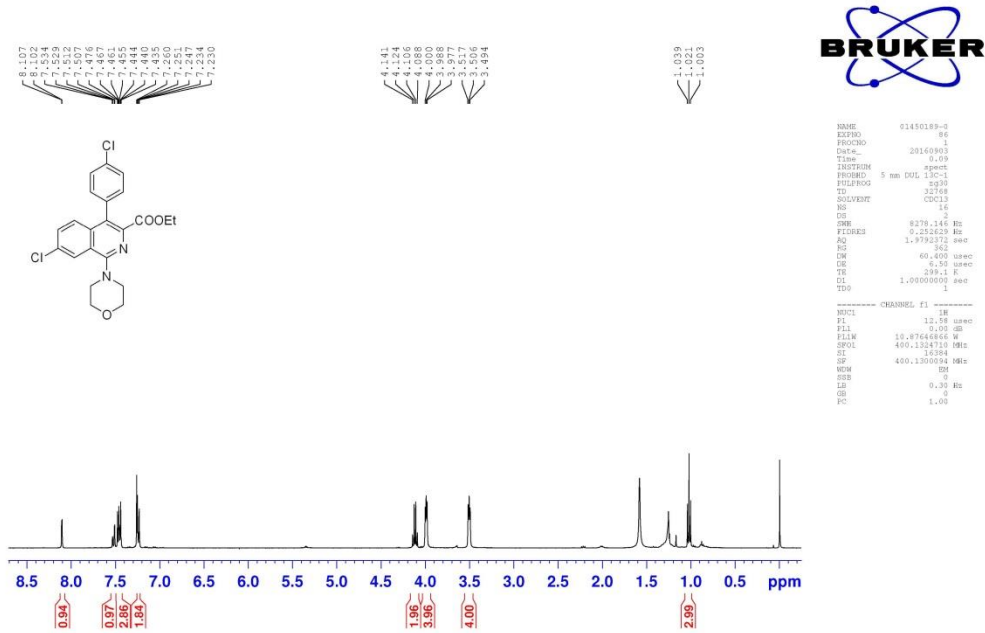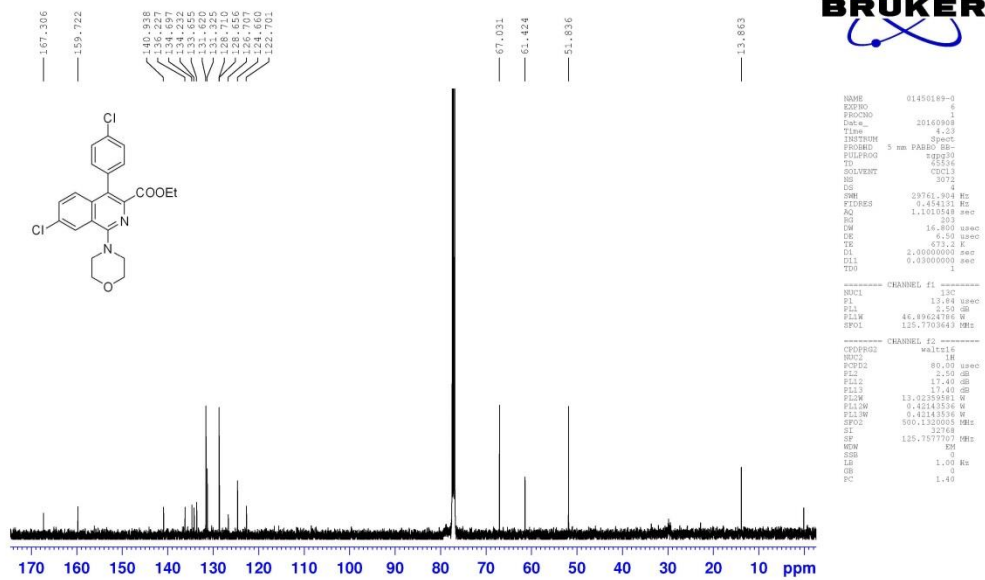



5e

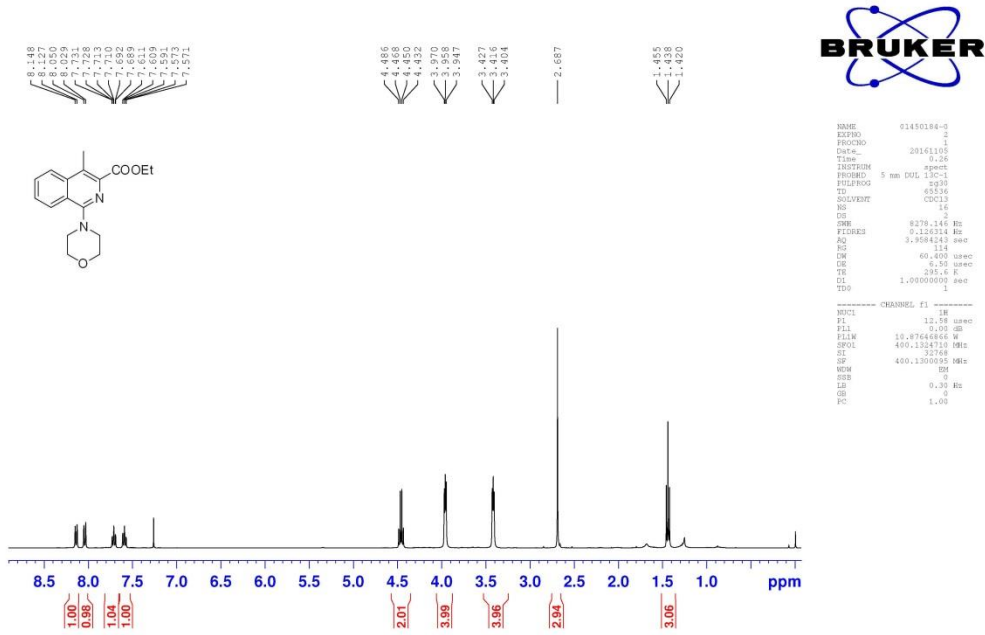

```

NAME      01450184-3
EXPNO    1
PROCNO   1
Date_    20161106
Time     0.26
INSTRUM  spect
PROBHD   5 mm DOL 15C-1
PULPROG  zgpg30
TD       65536
SOLVENT  CDCl3
NS       16
DS       4
SWH      6279.146 Hz
FIDRES   0.120214 Hz
AQ       3.9584243 sec
RG       114
WDW      EM
SSB      0
GB       0.30 Hz
PC       1.00
  
```

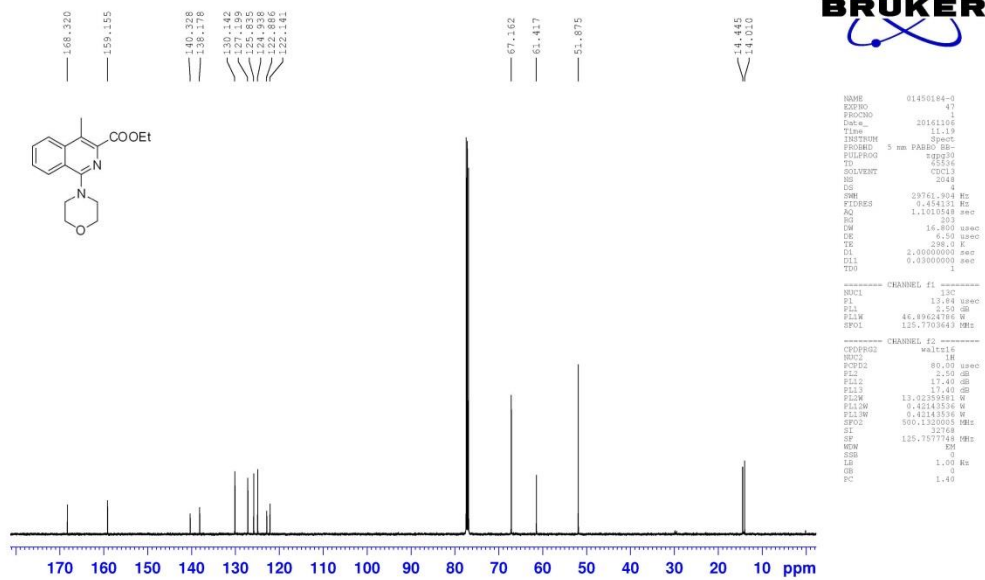

```

NAME      01450184-3
EXPNO    47
PROCNO   1
Date_    20161106
Time     11.19
INSTRUM  spect
PROBHD   5 mm PABBO QNP
PULPROG  zgpg30
TD       65536
SOLVENT  CDCl3
NS       2048
DS       4
SWH      23761.908 Hz
FIDRES   0.454131 Hz
AQ       1.1010518 sec
RG       203
WDW      EM
SSB      0
GB       0.30 Hz
PC       1.00
  
```

## V. Deuteration Studies

To provide preliminary insight into the reaction mechanism, 2,6-diphenyl aryl isocyanide **6** with one of the phenyl rings fully deuterated was used in an intramolecular competition study. An obvious kinetic isotope effect (KIE)  $k_H/k_D = 4.9$  was observed (eqn. 1).

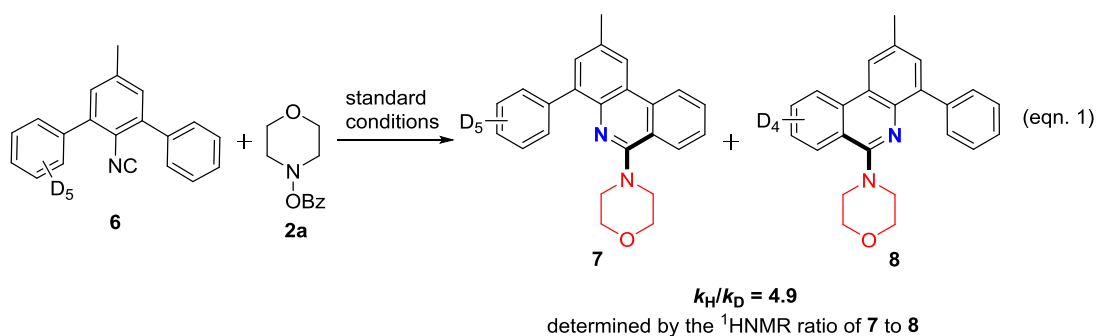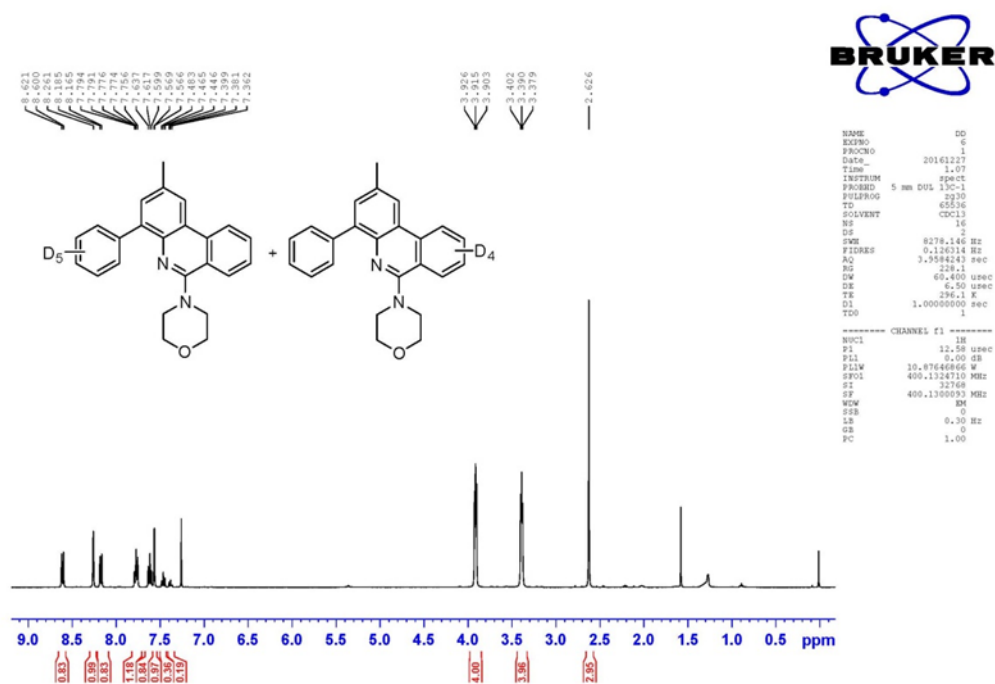

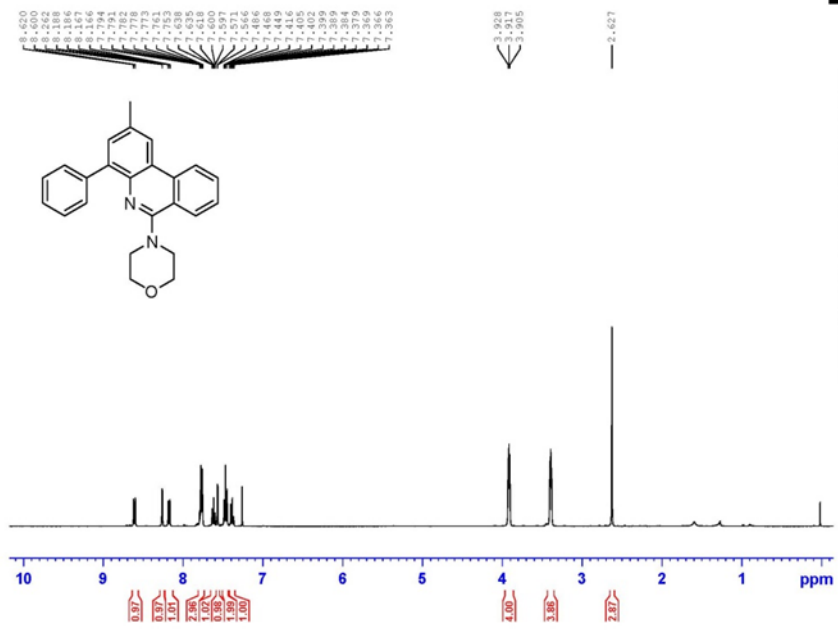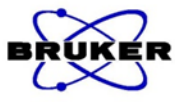

Supplement: c7qo00368d1.pdf [file c7qo00368d1.pdf]
